# Supplementary material for: Birth mode is associated with earliest strain-conferred gut microbiome functions and immunostimulatory potential
Source: PubMed Central journal article supplement (PMC6269548; doi:10.1038/s41467-018-07631-x), 2018-11-30
Supplement: 41467_2018_7631_MOESM2_ESM.pdf [file 41467_2018_7631_MOESM2_ESM.pdf]

Reviewers' comments:

Reviewer #1 (Remarks to the Author):

This very-well written paper is investigating the differences in the infant gut microbiome associated with mode of delivery (Cesarean section versus vaginal delivery). By using shotgun metagenomics, the authors describe the microbiome differences at multiple levels including the taxonomic composition, overall functional potential, and strain-level functional traits. Moreover, the study is supported by immunological assays (cytokine profiling), isolation of LPS from stool and tests in human cell lines. Overall the approach is sound and complete.

The main strengths of the paper are the combination of sequencing and functional profiling and the rigorous computational analysis, whereas the main limitation is the rather small sample size (12 mother-neonate pairs only 4 of which represent vaginal deliveries).

My main comments are listed below.

1. I think the sample size here is a bit small (12 mother-neonate pairs). Other studies of the infant gut microbiome are much larger, in the order of hundreds of infants such as PMID 28112736 and PMID 25974306. The problem of the small sample size is that some statistically significant differences in the functional potential could be driven by some specific strains enriched by chance in one of the considered groups. Can the authors test their conclusions using the data from PMID 28112736 and PMID 25974306? If their hypotheses are confirmed in these other two studies I think that the message would be much more statistically supported.

2. The main point of the paper is that birth mode (Cesarean against natural) influences the infant microbiome. However, other reports such as PMID 25974306 conclude that birth mode plays only a secondary role into the shaping of the gut microbiome. I think it is necessary that the authors directly deal with this partially conflicting theory, especially because this might again be related with the limited sample size.

Reviewer #2 (Remarks to the Author):

In this manuscript, Wampach et al test the hypothesis that microbes from mothers colonize their neonates, and then evaluate the metabolic functions encoded by the microbes that colonize the neonates. They compare the composition of neonates born by C-section vs. Vaginal delivery. The identity LPS, GAG degradation and other glycan degradation genes as being differentially abundant in VD neonates and find that stimulating primary human immune cells with LPS from VD neonate feces induces higher expression of TNF-alpha and IL18. These cytokines are also found to be more abundant in neonates born by VD compared to CSD. It does not appear that the authors controlled for potential confounders in this analysis, such as maternal exposure to antibiotics in the perinatal time period. The authors conclude that C-section influences mother-to-neonate microbe transmission and that this has immune-stimulatory effects with "likely effects" on human physiology later in life.

In general, the authors use appropriate and standard methods for sample collection from this small cohort, as well as appropriate methods for DNA extraction and data analysis. The method to remove "artifactual" reads is unusual based on my reading of work in this space, but as I am not an expert in neonate microbiome analysis, it is difficult for me to comment. Slightly older infant fecal samples typically have more than enough DNA, and thus are not low biomass. The

manuscript is, in general, well written, and the methods are well explained. The figures, though very dense, are of high quality.

Major concerns:

1) Recent manuscripts, notably Chu et al (Aagaard group) have put into question the model that bacterial strains are passed vertically from mother to child. Additionally re-analysis of existing data sets by Katie Pollard's group have done the same. This should be brought up in the introduction as this is a relevant, current, and very active and important debate in this field. Importantly, no data are provided regarding antibiotic exposure for the mothers or neonates. Maternal antibiotic exposure is probably a major confounder in these types of analyses, and should be explored. This should be possible as the authors have stated that they have a very rich and complete set of clinical metadata. Multivariable analysis are likely indicated to evaluate the impact of birth method on the questions at hand, especially as it relates to LPS production, for example.

2) The authors design a method that removes "artifactual" reads - this is useful for low biomass samples, but are fecal samples from neonates truly low biomass? Input DNA amounts for sequencing strategies using the Nextera prep, for example, require only 1ng of input DNA. I think the method the authors developed is reasonable, but it is interesting to note that most of the manuscripts that I have read on the topic of neonatal microbiome sequencing have not treated neonatal fecal samples as "low biomass". Does the removal of these "artifacts" result in dramatically different interpretations of the results?

Also, Regarding the choice of the artifact control sample, I found it interesting and unusual that Caco-2 cells were used - typically blank water controls are used for the controls, as mammalian cell culture likely is bacterially-contaminated. I find this choice rather unconventional.

3) In general, it would be nice if the authors pointed to the tools they use for "binning" (line 74), and identifying "strain-determining variant patterns" (line 75) in the actual manuscript. Also, how did they "reconstruct" genomes - they mention MEGAHIT in the methods, but it would be nice to cite this in the actual manuscript. Many of the references in the bioinformatic analysis section of the main manuscript appear to be incorrect or misplaced to me: for example, Ref 17 on line 74 appears incorrect (this referenced paper is not a binning tool as is implied by the location of the citation). Also, Ref 18 on line 75 appears to be incorrect. PhyloPhlAn is not a strain-determine variant pattern tool, as is implied by the location of the citation. In reading the methods, it is clear that the team engaged an experienced bioinformatician. It would be good if this bioinformatician carefully read over the main manuscript and checked all citations.

4) The inclusion of a significant proportion of infants who were small for gestational age (SGA) may have skewed results substantially. These are not healthy, usual, full-term births and are likely biological outliers. What is the justification/reasoning for inclusion of this group in the study? It was not clear to me.

5) For the LPS extraction, how did the authors account for samples where adequate LPS could not be extracted? Are we to conclude that LPS was absent? Did the authors measure the amount of LPS in the samples using methods such as targeted Mass spec? I am concerned that the size of the cohort studied and the limitations of not being able to extract LPS from all samples limits the generalizability of the findings presented. Also, why would babies born by VD have "higher immunostimulatory potential" than those born by CSD? A discussion of the expected impact of this observation would be helpful. Also, in the methods, it seems that of the 13 neonatal fecal samples, only 11 produced measurable quantities of LPS. In the main manuscript, I read this section as suggesting that 13 samples produced measurable quantities of LPS. Were samples that did not produce LPS from the VD, CSD or CSD+SGA cohorts? Why were only some of the total samples available for LPS extraction?

Given the very small n here, it seems that the results are depicted are of limited strength and may be very susceptible to over-interpretation.

Furthermore, based on Figure 4, it appears that Escherichia is highly abundance in all but one VD individual. Has this been described in other studies? Is this what is driving the LPS abundance in these samples? If so, this is worth discussing in the manuscript and putting into context for the readers. I would read the figure as Escherichia species being highly abundant in the neonatal microbiome of VD infants and that this may have consequences for LPS production. Is the E. coli that is present in these individuals the strain(s) that is from the mother? Based on Figure 3a, it does not appear so, as best as I can tell. So is one to conclude that VD neonates have a high abundance of E. coli that produces immunostimulatory LPS, but that the likely producer of this LPS (E. coli, which is abundant), is not vertically transmitted? If this interpretation is correct, I am not sure how the two main thrusts of the manuscript link to one another. Another area of confusion for me is EDFig 2C. In the neonatal stool from day 3, which I believe was used for the LPS extraction, I do not see many samples that have abundant Escherichia, as would be expected from Figure 4 - in fact, the samples that were chosen from the VD cohort for the LPS study appear to be the only two VD samples that have detectable E. coli. This may be skewing the results.

6) How was the LPS concentration and purity determined for each LPS sample that was extracted from feces determined? The effects that they saw may have to do largely with purity of the LPS as opposed to structural differences / immunogenicity of the LPS. I would be more convinced of the argument they are trying to make if each of the LPS samples had been subjected to mass spectrometry to evaluate purity, for example. I simply worry that the LPS extraction procedure is, in itself, very flawed and subject to error. And with such a small n, the results may not be terribly robust, even if intriguing.

Minor:

1) Not enough detail in the manuscript - how were differentially abundant functional categories from KEGG identified? I appreciate the strict space limitations, but some information regarding method should be included in the manuscript.

2) The authors refer to how the "early microbial functions in VD neonates reflected the mothers' functional microbiome profiles" on line 86-87, but they have not yet introduced any analysis of the mother's microbiome. This is confusing to me. Also, are they looking at the maternal vaginal microbiome or the maternal stool microbiome (both of which have been correlated with the neonatal microbiome). Did they look at the neonatal fecal microbiome and the maternal skin microbiome to compare functional potential? This would be suggested by Dominguez-Bello's paper from PNAS 2010.

3) The methods applied in Supplementary note 3 (to determine if birth method affected the microbiome) are not adequately explained and do not appear to be statistically driven. What is presented is not adequate to conclude that "the different feeding regimes of neonates did not explain the functional differences ..." on lines 94-95.

4) It seemed like the LPS biosynthesis gene was "cherry-picked" from a list of significantly differentially abundant genes. Also, what was the FDR cutoff? Why was this gene chosen? What were the most significantly differentially abundant genes?

5) GAG and other glycan metabolism is mentioned in the abstract but is only addressed in the supplement. If this is an important point, it should be included in the main manuscript. If not in the main manuscript, it should be left out of the abstract.

6) When cytokine levels were obtained from 31 neonates, it seems inappropriate to label the 14 additional infants as an "independent validation cohort" if the results are aggregated with the

discovery cohort. This is misleading to me.

7) The reference citation format appears to change at line 404. This is a small typographical issue.

Reviewer #3 (Remarks to the Author):

In this interesting research paper by Wampach et al, authors used a very robust bioinformatics approach to track specific bacterial strains from mothers to neonates during the perinatal period, taking into account levels of genetic diversity using well-established molecular ecology methods. This study has numerous strengths that are original and should be published: it combined taxonomic and functional profiling of the microbiome using reference independent metagenomics analysis, included controls and a bioinformatic approach that accounted for reagent and host derived contaminant DNA and removal of sequencing artifacts, and utilized sequencing data to inform the experimental parameters of an immune assay, which was informative of the potential interactions between LPS and the immune system. However, these strengths are not the main claim of this study. This clinical study was not designed nor was it shown to be powered to determine perinatal microbiome differences driven by mode of birth, and its results should not be interpreted as such. Below is a list of major and minor suggestions that should be incorporated in a new version of this manuscript.

Major comments

1. The sample number in this study is simply too low and there were no power calculations performed a priori to determine if it could identify difference between birth modes. Given that other small studies have failed to show microbiome differences driven by birth mode, it is hard to believe that this study was powered to assess the influence of birth mode, let alone the influence of low birth weight. I recommend that authors present power calculations based on previously published data to determine this. A good resource to perform these calculations for studies with multivariate data is MetSizeR. Clearly, the results from this study are in line with most other studies that have convincingly shown that mode of birth drives temporal neonatal composition and diversity. However, a recent study from the Xavier group (DOI: 10.1126/scitranslmed.aad0917) showed that while most CS births were associated with lower Bacteroides species abundance, about 20% of the VD babies displayed a similar pattern. With an N=4 per group (including 1 set of twins in the CSD groups) with only 2 valid time points (Day 1 only had 2 samples in 2 of the groups, so in my opinion should be excluded for comparisons), there is simply no statistical power to detect appropriate variance of a given population, especially considering the interindividual variability of the gut microbiome during the first days of human life.

2. Although differences between groups were detected using appropriate statistical tests, without confidence intervals and proper statistical tests to deconfound the effect of birth mode from other variables known to influence microbiome composition, it is not possible to properly assess whether birth mode truly drives these differences. Given that authors have access to 20 more samples (6 for which they had 16S data and 14 from a previous cohort that was collected in a similar way), the authors could use the 16S data and PICRUSt, at a minimum, to determine if other variables are also influencing the associations found between birth mode and microbiome composition. An excellent tool for this purpose is MsAsLin (<https://huttenhower.sph.harvard.edu/maaslin>). Variables to include in this model are gestational age, antibiotic use, dose, duration, time of meconium passage, if babies ingested colostrum, etc. In addition, authors should demonstrate that the samples used for metagenomics analysis are representative of the larger group of samples. For this, they could compare microbiome characteristics (beta or alpha diversity) as well as clinical variables (mode of birth, gestational age, etc.)

3. The results from the immune assay with extracted LPS from different neonatal samples are quite compelling but remain rather preliminary, and could be enhanced in several ways. As it stands, the purity of the LPS was not assessed, it is vaguely assumed that the majority of the cytokine response measured originated from E.coli LPS, and although it is mentioned in the text, it is not known if the differences in cytokine response are due to differences in LPS structure. Addressing at least 2 of these issues will significantly strengthen this paper. LPS purity can be determined by gel electrophoresis (comparing silver, protein and DNA staining, for example), or if available, mass spectrometry analysis. Differences in LPS structure (rough vs smooth, for example) can also be obtained through these methods. LPS purity can also be confirmed functionally by showing that the purified products did not activate Toll-like receptor 2 (TLR2), nuclear oligomerization domain 1 (NOD1), or NOD2 but did activate TLR4. Importantly, if the authors have more samples from other cohorts available, why not increase the number of samples from this assay? As for determining the origin of the LPS, could LPS genes not be assigned to the mOTUs given that the information is available? This is important as it will inform which taxa may or may not be relevant in stimulating immune cells during the first days of life.

4. Extended data figure 2. Change colour palette. Too many tones of blues and greens. Don't do colour coordination according to phyla.

#### Minor comments

1. Re. blinding in Life Sciences reporting summary: "As assigned study groups were predefined prior to delivery, blinding was irrelevant to our study." This is false. Many studies with predefined study groups are blinded and this adds strength to the study design. This study was simply non blinded, please change.

2. FIGURE 2: It is unclear how the DESEQ2 generated results are displayed in Figure 2. Deseq2 compares 2 groups. According to Figure 2a it looks that the comparison was made between VD samples and all CSD samples combined but figure legend and methods section describes two separate comparisons. Were the same 5 pathways differential in both comparisons or only when VD samples were compared to all CS babies?

3. FIGURE 4: The figure legend does not fully explain 4a. Specifically, if was only after I read the main text that I understood that the EU amounts were measured in the immune assay. I was confused and initially thought it was the LPS concentration used in the assay.

4. Line 87, vaginal or stool in mothers?

5. Line 94-96 briefly mention what statistical method was used (if any) to rule out the influence of feeding method

6. Lines 99-105 Where there any comparisons done between VD samples and each of the CSD groups. If so, this should be mentioned in this section. If not why separate the CSD groups?

7. Line 144, sources of microbial origin are too speculative, I suggest removing

8. Line 174 I suggest changing "more specifically" for "especially"

9. Line 202-203 Huge stretch here. There is no data on chronic diseases in this super small cohort. Also omit from the summary figure in extended data.

10. Lines 483-487 Unclear why bacterial DNA amount needed to be controlled in the LPS assay.

Please elaborate either here or in the Supplementary notes. These assays conditions will not mimic the amount of LPS that interacts with peripheral immune cells so I do not understand the reasoning behind this. Why not normalize by LPS units only? DNA quantification via qPCR of 16S RNA gene will vary depending on the number of 16S copies per cell so it is not the best way to quantify bacterial load. Further, this method will account for all bacterial cells, not just gram-negative (LPS containing cells). Flawed method.

11. Line 124 of Supplementary notes: I would change "corresponded" to correlated

12. The manuscript could use a brief discussion on the choice of adult blood DCs and how it may have differed from neonate peripheral immune cells. Neonatal immune cells are known produce immune responses similar to adults in some aspects but not others.

27 **Reviewer # 1**

28 **Overall summary**

29 **1.1.** This very-well written paper is investigating the differences in the infant gut  
30 microbiome associated with mode of delivery (Caesarean section versus vaginal  
31 delivery). By using shotgun metagenomics, the authors describe the microbiome  
32 differences at multiple levels including the taxonomic composition, overall functional  
33 potential, and strain-level functional traits. Moreover, the study is supported by  
34 immunological assays (cytokine profiling), isolation of LPS from stool and tests in  
35 human cell lines. Overall the approach is sound and complete.

36  
37 The main strengths of the paper are the combination of sequencing and functional  
38 profiling and the rigorous computational analysis, whereas the main limitation is the  
39 rather small sample size (12 mother-neonate pairs only 4 of which represent vaginal  
40 deliveries).

41  
42 **Response:**

43 We appreciate the reviewer’s recognition of the quality and comprehensiveness of the  
44 study. In light of the editor’s and reviewers’ comments, we have analyzed additional  
45 16S rRNA gene amplicon and metagenomic sequencing data from collected samples  
46 that cover the first 5 days *postpartum* (please refer to the table below for an overview  
47 on the additional data that has been included in the revised manuscript;  
48 **Supplementary Data 1**). Please also refer to our reply to **comment 1.2.** below for a  
49 more detailed description of the additional samples collected as well as the additional  
50 analyses performed. While the increased number of samples underscores the  
51 statistical analyses, we want to emphasize that the main thrust of the manuscript is not  
52 solely statistics-driven. Given their high degree of specificity, the presence of  
53 transferred strains is relevant only on an individual, sample-to-sample basis in relation  
54 to resolving mother-to-neonate transfer. In particular, using our high-quality data, we  
55 are able to resolve the transfer of strains and linked functional repertoire on a  
56 personalized level at the required level of specificity. This in turn is necessary to  
57 address questions of mother-to-neonate transfer. Please also refer to our detailed  
58 response to **comment 3.2.** for more information. Important to stress is that the results  
59 from the analysis of the additional data support our original conclusions.

60

|                 | Total number of samples | Total number of neonates | Study group composition           |
|-----------------|-------------------------|--------------------------|-----------------------------------|
| Initial dataset | 130                     | 18                       | 7 VD, 6 CSD, 5 CSD + SGA          |
| Updated dataset | <b>176</b>              | <b>33</b>                | <b>15 VD, 13 CSD, 5 CSD + SGA</b> |

61  
62 **Major comments**

63 **1.2.** I think the sample size here is a bit small (12 mother-neonate pairs). Other studies  
64 of the infant gut microbiome are much larger, in the order of hundreds of infants such  
65 as PMID 28112736 and PMID 25974306. The problem of the small sample size is

66 that some statistically significant differences in the functional potential could be  
67 driven by some specific strains enriched by chance in one of the considered groups.  
68 Can the authors test their conclusions using the data from PMID 28112736 and PMID  
69 25974306? If their hypotheses are confirmed in these other two studies I think that the  
70 message would be much more statistically supported.

71  
72 **Response:**

73 We thank the reviewer for the relevant comment. While other studies with a focus on  
74 the neonatal gut microbiome have involved apparent larger (albeit uneven for VD and  
75 CSD) sample sizes, these studies have not involved the systematic collection and  
76 appropriate preservation of paired mother and infant samples along the timeline of our  
77 study or have not included very early neonatal samples. However, the collection of  
78 such samples is essential to track differences between earliest microbiome  
79 colonization in relation to delivery mode and to resolve potential vertical transmission  
80 of specific strains and encoded functions from mothers to neonates. In other words,  
81 only if the same sample types (i.e. stool) and collection time points (i.e. prior to  
82 delivery for the mother and shortly *postpartum* for the neonate) are matched per  
83 mother-neonate pair, one can objectively assess the vertical transfer of gut strains  
84 from one mother to her respective neonate.

85  
86 With reference to the studies cited by the reviewer in relation to potentially validating  
87 our findings, PMID 28112736 presents only 2 out of 49 mother-infant pairs, for which  
88 stool samples were collected from both mother and neonate shortly after birth. In both  
89 pairs, infants were delivered vaginally, which makes the assessment of the delivery  
90 mode effect on strain transfer impossible. On the other hand, PMID 25974306  
91 presents 26 out of 98 mother-infant pairs for whom maternal stool samples were  
92 collected at the day of delivery. In fact, previous analyses by Nayfach *et al.* (PMID  
93 27803195) based on the data from PMID 25974306 were able to detect strain  
94 transmission from mother to neonate in case of vaginal delivery. However, they were  
95 unable to resolve any strains from the samples collected from CSD mother-neonate  
96 pairs. Consequently, the effect of delivery mode in relation to strain transfer could not  
97 be assessed properly. For our revised manuscript, our findings were put into context  
98 with regards to these relevant previous studies especially within the extended text  
99 limits of a *Nature Communications* article.

100  
101 [Introduction, manuscript lines 48 to 51](#): During vaginal birth, specific bacterial strains  
102 are transmitted from mothers to infants<sup>3-6</sup> and differences in microbial colonization in  
103 neonates born by CSD have been identified<sup>7-10</sup> as early as 3 days postpartum<sup>7,10</sup>.

104  
105 [Introduction, manuscript lines 90 to 99](#): At the same time, several studies have  
106 hypothesized that CSD impedes the vertical transfer of strains from mother to neonate  
107 during delivery<sup>3,4,18,25</sup>. In addition, although single nucleotide variants (SNVs) have  
108 been tracked over time, no such studies have so far covered the earliest time points  
109 after delivery (days 0-5) in well-matched mother-neonate pairs with respect to a direct



110 comparison of delivery modes. Consequently, there is a strong need for adequate  
111 high-resolution metagenomic analyses capable of resolving the vertical transmission  
112 of individual-specific strains and encoded functions from mothers to neonates on an  
113 individual basis, while also supplementing observed *in silico* findings with further *in*  
114 *vitro* validation experiments.

115

116 Discussion, manuscript lines 444 to 454: While previous studies have used analogous  
117 analytical approaches (16S rRNA gene amplicon sequencing and metagenomics) to  
118 resolve the early neonatal gut microbiome, they have not involved the systematic  
119 collection and appropriate preservation of paired mother-neonate samples<sup>11</sup>, they did  
120 not specifically track vertical strain transfer<sup>11,18</sup>, they did not include provisions for  
121 the removal of artefactual sequences<sup>3,5,6,11,18</sup>, they did not focus on the earliest time  
122 points after delivery<sup>3,18</sup>, nor did they analyse differences of functional potential  
123 according to delivery mode<sup>3,5,6,11,18</sup>. However, consideration of these factors is  
124 essential to assess the effect of delivery mode on the earliest transfer of community  
125 structure and function, subsequent microbiome colonization patterns and the resulting  
126 implications for neonatal physiology.

127

128 In summary, the publicly available data is not appropriate for validating our findings.  
129 In the vast majority of cases, the sample type and collection time point for both  
130 mothers and neonates are not properly matched, which makes the assessment of strain  
131 transfer and the linked transfer of functional potential impossible. Additionally,  
132 although strain transfer was analyzed in previous studies, no effect of delivery mode  
133 could be assessed due to a lack of neonates delivered by C-section.

134

135 In order to address the reviewer's valid concern regarding the overall sample size, we  
136 have performed analyses of additional 16S rRNA gene amplicon and metagenomic  
137 data from additional mother-neonate pairs (see table above under **comment 1.1**;  
138 **Supplementary Data 1**). Moreover, we have performed additional analyses assessing  
139 the physiological effects of the observed functional differences between CSD and VD  
140 neonates (**Fig. 4a; Supplementary Fig. 11 and 12; Supplementary Data 12 and 13**).  
141 The results of these analyses support our original conclusions, especially with regards  
142 to the significantly increased relative abundance of Gram-negative bacteria in early  
143 faecal samples of VD neonates as well as the significantly increased functional  
144 potential of the earliest VD gut microbiome with respect to LPS biosynthesis.

145

146 Results, manuscript lines 252 to 258: To corroborate the apparent higher propensity of  
147 the VD microbiome for LPS biosynthesis, we annotated the OTUs resulting from the  
148 16S rRNA gene amplicon sequencing data according to their attributed Gram staining  
149 information. Hereby, we observed that the gut microbiomes of VD neonates  
150 harboured significantly higher relative abundances of Gram-negative bacteria at days  
151 3 and 5 compared to CSD ( $\pm$ SGA) neonates (Wilcoxon rank-sum test, FDR-adjusted  
152  $P = 1.7 \times 10^{-3}$  and  $P = 4.0 \times 10^{-3}$  for day 3 and 5 respectively; Supplementary Fig.  
153 3b).

154 **1.3.** The main point of the paper is that birth mode (Caesarean against natural)  
155 influences the infant microbiome. However, other reports such as PMID 25974306  
156 conclude that birth mode plays only a secondary role into the shaping of the gut  
157 microbiome. I think it is necessary that the authors directly deal with this partially  
158 conflicting theory, especially because this might again be related with the limited  
159 sample size.

160  
161 **Response:**

162 We thank the reviewer for this comment. The results of our study demonstrate that  
163 early differences exist in the gut microbiomes of neonates born vaginally or via  
164 caesarean section, and that these differences may impact early immune system  
165 stimulation. Our findings do not conflict with the results of the study highlighted by  
166 the reviewer as the authors of that study found, similar to our own results, that the gut  
167 microbiome of vaginally delivered infants exhibits significantly greater resemblance  
168 to the mothers' microbiome when compared to infants delivered by C-section (the  
169 authors also found that the microbiome is shaped by nutrition; such differences are  
170 however only apparent outside of the time window of our study). Our study adds  
171 essential new elements to these earlier observations by describing the direct transfer  
172 of specific strains from mother to infants in the context of vaginal delivery, the  
173 differences in functional potential of the earliest microbiome conferred by these  
174 strains and the potential physiological repercussions of these differences during the  
175 first days of life. Thereby, our results do not sit at odds with previous observations but  
176 expand on these and provide new mechanistic insights into the physiological  
177 repercussions of a lack of transfer of specific microbiota from mother to infant in the  
178 case of C-section. For the revised manuscript, we have included the reviewer's  
179 suggested references in order to properly situate our study and results amongst the  
180 currently partially conflicting results from other studies. In this context, we highlight  
181 previous work, inconsistencies and general trends in the field of neonatal gut  
182 microbiome colonization.

183  
184 Introduction, manuscript lines 51 to 55: However, due to conflicting results, which  
185 principally imply a negligible impact of delivery mode on the colonizing neonatal  
186 microbiome in the gut<sup>11</sup>, it remains unclear whether disruption of mother-to-infant  
187 transmission of microbiota through CSD occurs and whether it affects human  
188 physiology early on, with potentially persistent effects in later life.

189  
190 Introduction, manuscript lines 65 to 76: While the majority of studies so far indicate  
191 that delivery mode is the strongest factor determining early neonatal gut microbiome  
192 colonization<sup>3,7-10,18</sup>, these effects are either extenuated or largely absent in other  
193 studies<sup>11,19</sup>. Nevertheless, the possibility of microbial transfer from mother to neonate  
194 during vaginal delivery cannot be excluded in studies which have reported a  
195 negligible effect due to delivery mode<sup>11</sup>. In this context, it is important to consider  
196 that CSD may be performed as a result of underlying maternal or foetal medical

197 conditions (e.g. multiple gestation, foetal malpresentation or suspected foetal  
198 macrosomia)<sup>20</sup> and can co-occur with other microbiome-influencing factors. More  
199 specifically, CSD is most often accompanied by the administration of antibiotics to  
200 mothers due to local health regulations or hospital practices (e.g. in case of a positive  
201 screening of the mother for group B *Streptococcus*)<sup>21</sup>.

## 203 **Reviewer # 2**

### 204 **Overall summary**

205 **2.1.** In this manuscript, Wampach et al test the hypothesis that microbes from mothers  
206 colonize their neonates, and then evaluate the metabolic functions encoded by the  
207 microbes that colonize the neonates. They compare the composition of neonates born  
208 by C-section vs. Vaginal delivery. The identity LPS, GAG degradation and other  
209 glycan degradation genes as being differentially abundant in VD neonates and find  
210 that stimulating primary human immune cells with LPS from VD neonate faeces  
211 induces higher expression of TNF-alpha and IL18. These cytokines are also found to  
212 be more abundant in neonates born by VD compared to CSD. It does not appear that  
213 the authors controlled for potential confounders in this analysis, such as maternal  
214 exposure to antibiotics in the perinatal time period. The authors conclude that C-  
215 section influences mother-to-neonate microbe transmission and that this has immune-  
216 stimulatory effects with “likely effects” on human physiology later in life.

217  
218 In general, the authors use appropriate and standard methods for sample collection  
219 from this small cohort, as well as appropriate methods for DNA extraction and data  
220 analysis. The method to remove “artefactual” reads is unusual based on my reading of  
221 work in this space, but as I am not an expert in neonate microbiome analysis, it is  
222 difficult for me to comment. Slightly older infant faecal samples typically have more  
223 than enough DNA, and thus are not low biomass. The manuscript is, in general, well  
224 written, and the methods are well explained. The figures, though very dense, are of  
225 high quality.

### 226 **Response:**

227 We appreciate the reviewer’s recognition of the main message of the study as well as  
228 the overall high quality of the manuscript. In relation to the reviewer’s comment on  
229 potential confounders, we have performed additional multivariate analyses (using the  
230 multivariate tool MaAsLin), in relation to maternal antibiotics intake, day of sample  
231 collection, gestational age, delivery mode and feeding regime. The results of these  
232 additional analyses demonstrate that the maternal intake of antibiotics may have a  
233 small effect on the neonatal gut microbiome composition but that the observed  
234 fundamental changes in earliest community compositions are first and foremost due to  
235 the delivery mode. For further information, please refer as well to our response to  
236 **comment 2.2.** below.

239 Results, manuscript lines 194 to 202: In order to resolve the effect of delivery mode  
240 from other potential contributing factors such as maternal antibiotic intake prior to  
241 delivery, gestational age, feeding regime and sampling time point, differentially  
242 abundant taxa for both 16S rRNA gene amplicon and metagenomic sequencing data  
243 were determined separately using a multivariate additive general model approach  
244 (MaAsLin<sup>35</sup>). Taking into account the effects of the above-mentioned factors, delivery  
245 mode was found to be the dominant driver of neonatal gut microbiome colonization,  
246 with other measured factors having considerably less of an effect (Supplementary  
247 Note 4; Supplementary Data 9).

248

249 Results, manuscript lines 260 to 267: A multivariate analysis (MaAsLin<sup>35</sup>) was  
250 performed to compare the functional profiles of CSD ( $\pm$ SGA) to VD neonates and for  
251 both generated datasets (i.e. predicted KO functional categories based on 16S rRNA  
252 gene amplicon sequencing data and annotated KOs based on metagenomic sequencing  
253 data). Results from the multivariate analyses demonstrated that delivery mode was the  
254 strongest determining factor in both datasets (i.e. predicted and metagenomic-based  
255 KOs) for explaining differentially abundant genes (Supplementary Data 9).

256

257 Supplementary Information, Supplementary Note 4: The administration of antibiotics  
258 to mothers prior to caesarean section delivery is often (e.g. in Luxembourg)  
259 mandatory, resulting in delivery by caesarean section and the maternal intake of  
260 antibiotics to be commonly coinciding factors. Additionally, vaginally delivering  
261 mothers that are positively screened for group B *Streptococcus* infection receive  
262 antibiotics prior to delivery to reduce the risk of infections in neonates. For these  
263 reasons, most mothers were administered antibiotics in this study, for both delivery  
264 modes. As other factors (e.g. day after delivery, gestational age, feeding regime, etc.)  
265 have been suggested to impact neonatal gut microbiome colonization as well, we used  
266 a multivariate analysis (MaAsLin<sup>35</sup>) to identify differentially abundant taxa for both  
267 metagenomic and 16S rRNA gene amplicon sequencing data (Supplementary Data 9).  
268 After correcting for the respective effects of all the above-mentioned variables for the  
269 metagenomic sequencing data, three mOTUs were associated with delivery mode  
270 (CSD $\pm$ SGA) and at the same time maternal antibiotics intake, namely *Bacteroides*  
271 *fragilis* (for all conditions:  $Q = 8.1 \times 10^{-3}$ ), *Bacteroides xylanisolvens* (for all  
272 conditions:  $Q = 8.1 \times 10^{-3}$ ) and *Parabacteroides merda* (for all conditions:  $Q = 8.1 \times$   
273  $10^{-3}$ ). In contrast, when correcting the different factors for the larger cohort screened  
274 by 16S rRNA gene amplicon sequencing using MaAsLin<sup>35</sup>, delivery mode had a  
275 distinct driving effect on the earliest microbiome. More specifically, *Bacteroides* was  
276 significantly decreased in CSD $\pm$ SGA neonates ( $Q = 2.6 \times 10^{-3}$  and  $Q = 2.9 \times 10^{-2}$ ) as  
277 well as Bacteroidaceae (CSD;  $Q = 3.9 \times 10^{-2}$ ). One OTU of *Escherichia-Shigella* was  
278 significantly decreased in CSD $\pm$ SGA neonates (both  $Q = 3.6 \times 10^{-2}$ ). Two OTUs  
279 belonging to *Bacteroides* ( $Q = 3.6 \times 10^{-2}$  and  $Q = 3.9 \times 10^{-2}$ ) and two OTUs belonging  
280 to *Bifidobacterium* ( $Q = 1.6 \times 10^{-2}$  and  $Q = 4.8 \times 10^{-2}$ ) were significantly decreased in  
281 CSD neonates while one OTU belonging to *Staphylococcus* was significantly  
282 increased in CSD neonates relative to VD ( $Q = 2.3 \times 10^{-2}$ ). Feeding regime was found

283 to be a potential contributing factor of the relative abundances of *Trichococcus*  
284 (formula feeding and mixed feeding regime;  $Q = 3.6 \times 10^{-3}$  and  $Q = 4.6 \times 10^{-2}$ ),  
285 *Escherichia-Shigella* (mixed feeding regime;  $Q = 1.3 \times 10^{-2}$ ) and one OTU belonging  
286 to *Rothia* (formula feeding regime;  $Q = 2.9 \times 10^{-4}$ ). The genus *Proteus* ( $Q = 1.0 \times 10^{-2}$ )  
287 was associated with maternal antibiotics intake and multiple genera and OTUs were  
288 associated with faecal samples collected at day 1 postpartum. Although we cannot  
289 exclude an effect of maternal antibiotic exposure or minor effects of feeding regime  
290 or collection time point on the taxonomic composition of the neonatal gut  
291 microbiome, the main differences in microbial taxa in both datasets (16S rRNA gene  
292 amplicon and metagenomic sequencing data) were clearly due to delivery mode.

293

294 An additional analysis to test for differentially abundant taxa associated with delivery  
295 mode was performed using ANCOM<sup>73</sup>. The results further confirmed the significantly  
296 decreased relative abundances of *Bacteroides*, *Escherichia-Shigella*, *Bifidobacterium*  
297 and *Parabacteroides* in CSD±SGA neonates, while *Staphylococcus* was significantly  
298 increased in CSD±SGA neonate (all these results were based on the statistical  
299 analyses based on Wilcoxon rank-sum tests, as well as the multivariate analyses). Our  
300 results demonstrate that although several minor trends inside the earliest neonatal gut  
301 microbiome were associated with distinct neonatal or maternal factors, the observed  
302 fundamental changes in earliest community compositions were first and foremost due  
303 to the delivery mode.

304

305 Discussion, manuscript lines 477 to 480: Our results based on both 16S rRNA gene  
306 amplicon and metagenomic sequencing, and supported by multivariate analyses,  
307 demonstrate that early differences exist in the gut microbiomes of neonates and that  
308 these differences are predominantly driven by the mode of delivery.

309

310 Regarding the study design and employed methods, we would like to emphasize that  
311 our study involved the systematic and careful collection of high-quality samples from  
312 the first days of life. While indeed not routine, the failure of removing artefactual  
313 reads may lead to serious flaws in interpretation, particularly when working on  
314 samples containing a low microbial biomass. In the absence of appropriate controls,  
315 sequences derived from contaminant taxa in reagents may be relatively prominent,  
316 mask actual signals from taxa present and confound results regarding the presence of  
317 actual taxa (doi:10.1038/nature.2014.16327; doi:10.1186/s12915-014-0087-z; doi:10.  
318 1371/journal.pone.0110808; doi:10.1038/d41586-018-00664-8; our own recent work  
319 on contaminant RNA in low-biomass samples: doi:10.1186/s12915-018-0522-7).  
320 Failure to remove contaminants may in fact be partially responsible for the  
321 conflicting results in earlier studies, especially in relation to apparent mother-to-  
322 infant transfer. We are confident of the need for the applied methodological  
323 workflow especially in relation to the removal of contaminant sequences and we  
324 addressed this more specifically in the discussion of the revised manuscript.

325

326 Results, manuscript lines 153 to 180: To account for the presence of artefactual  
327 sequences in the metagenomic data, we devised an additional, combined *in vitro* and  
328 *in silico* strategy to identify and remove artefactual sequences from the metagenomic  
329 data (Fig. 1a). For the *in vitro* part, DNA was extracted from a human gut epithelial  
330 cell line using the same procedure as for the neonatal stool samples and diluted to the  
331 levels of DNA extractable from the collected low-biomass samples (Methods). The  
332 choice of human DNA as a negative control was based on the following criteria: (i)  
333 the inability to generate a sequencing library from blank water control samples due to  
334 the inherent very low amounts of DNA (these are typically below the threshold for  
335 library construction); (ii) the ability to clearly differentiate signal (in the titration  
336 series: human sequences) from artefacts (non-human sequences); microbial DNA was  
337 not chosen as the homology between contaminant and *bona fide* sequences may have  
338 confounded delineation; (iii) the removal of human sequences is common practice  
339 when performing metagenomic analyses on human samples and appropriate methods  
340 exist to distinguish between human and microbial sequences *in silico*; (iv) the  
341 blinding of the variability originating from the laboratory environment or sequencing  
342 facility due to the nature of the samples (i.e. human control samples were treated with  
343 the exact same reagents as the faecal study samples). Our *in silico* workflow for the  
344 identification and removal of artefacts from metagenomic data (Fig. 1b) first clusters<sup>32</sup>  
345 contigs from the artefact control samples and the study samples together  
346 (Supplementary Fig. 1a). It subsequently removes contigs from study samples that  
347 cluster with the artefactual contigs, i.e. that fall into the same bin (Supplementary  
348 Note 1). After subsequent filtering steps and the successful removal of artefactual  
349 contigs from all study samples, we observed differences in the number of removed  
350 reads according to sample type (Supplementary Fig. 1b; Supplementary Data 2).  
351 Based on this essential data curation step, sequences from *Achromobacter*  
352 *xylooxidans* or *Burkholderia* spp. taxa were for example identified and subsequently  
353 eliminated from the *bona fide* metagenomic data.

354

355 Discussion, manuscript lines 464 to 477: As earliest neonatal gut microbiome samples  
356 are naturally of low biomass, the accurate identification and removal of potential  
357 artefactual sequences is essential. In the absence of appropriate controls, sequences  
358 derived from contaminant taxa in reagents may be relatively prominent, thereby  
359 masking actual signals and confounding results regarding in particular the transfer of  
360 taxa and functions from mothers to neonates. In our study, adequate controls were  
361 included and putative artefactual reads removed based on a combined *in vitro* and *in*  
362 *silico* workflow. In order to reach the required specificity (and thereby resolution) to  
363 unambiguously address the question of vertical transmission of microbial community  
364 structure and function from mother to neonate, the use of curated, high-resolution  
365 metagenomic sequencing data, rather than solely performing 16S rRNA gene  
366 amplicon sequencing, is imperative. More specifically, the applied methodological  
367 approach, allows the highly specific tracking of individual microbial functions and  
368 strains from mother to neonates on an individual basis.

369

370 **Major comments**

371 **2.2.** Recent manuscripts, notably Chu et al (Aagaard group) have put into question the  
372 model that bacterial strains are passed vertically from mother to child. Additionally  
373 re-analysis of existing data sets by Katie Pollard's group have done the same. This  
374 should be brought up in the introduction, as this is a relevant, current, and very active  
375 and important debate in this field.

376  
377 Importantly, no data are provided regarding antibiotic exposure for the mothers or  
378 neonates. Maternal antibiotic exposure is probably a major confounder in these types  
379 of analyses, and should be explored. Multivariable analyses are likely indicated to  
380 evaluate the impact of birth method on the questions at hand, especially as it relates to  
381 LPS production, for example.

382  
383 **Response:**

384 We thank the reviewer for this point and agree that the field of neonatal colonization  
385 is currently actively discussing some contradictory findings. In accordance with the  
386 reviewer's suggestion, we have discussed the previous work, inconsistencies and  
387 general trends in the introduction of the revised manuscript. Apart from the issues  
388 surrounding the impact of contamination on observed early colonization patterns (see  
389 also our detailed response to **comment 2.1.** above), another important consideration  
390 for inconsistent results regarding potential vertical transmission from mother to infant  
391 and early microbial colonization is the fact that the methods used to date (particularly  
392 16S rRNA gene amplicon sequencing) do not afford the required specificity (and  
393 thereby resolution) to unambiguously address this question. In contrast, our  
394 methodological approach based on metagenomic sequencing allows the highly  
395 specific tracking of strains from mother to neonates on an individual basis, which is  
396 necessary to unambiguously link specific organisms from specific mother-neonate  
397 pairs. Nevertheless, it is important to stress that the work by Chu et al. (highlighted by  
398 the reviewer) made observations which go in the same direction as our results, e.g.  
399 that meconium samples harbor OTUs that originate from the maternal gut  
400 (doi:10.1038/nm.4272). As these observations were based on 16S rRNA gene  
401 amplicon sequencing, it is important to highlight that we were able to expand on these  
402 previous suggestions and provide detailed results from corresponding high-resolution  
403 metagenomic sequencing data. More specifically, we were able to perform strain-  
404 tracking from mothers to infants on a case-by-case basis and assess differences at the  
405 level of the functional potential.

406  
407 [Introduction, manuscript lines 83 to 88](#): Apart from confounding factors, the methods  
408 and study designs employed over the past years may in part explain some of the  
409 conflicting results regarding the effect of delivery mode on the early gut microbiome.  
410 Notably, taxonomic profiling based on rRNA gene amplicon sequencing does not  
411 offer sufficient resolution to assess the direct effect of the delivery mode at the level  
412 of strain transmission, which is expected to be a determinant of succession.

413 C-section and maternal antibiotics intake are commonly coinciding factors, also in  
414 multiple previous studies. In Luxembourg, the maternal administration of antibiotics  
415 in case of C-section delivery is mandatory. Additionally, vaginally delivering mothers  
416 that were positively screened for group B *Streptococcus* infection receive antibiotics  
417 prior to delivery to reduce the risk of neonatal infection. Collectively, this reflects  
418 why most study participants were administered antibiotics in the framework of this  
419 study and for either delivery mode. According to the additional multivariate analyses,  
420 which we have performed using MaAsLin, delivery mode was the most determinant  
421 driver of the neonatal gut microbiome composition. However, when considering the  
422 metagenomic sequencing data, three mOTUs, namely *Bacteroides fragilis*,  
423 *Bacteroides xylanisolvens* and *Parabacteroides merda*, were associated with both  
424 factors, delivery mode (CSD±SGA) and maternal antibiotics intake. Although we  
425 cannot exclude an effect of maternal antibiotic exposure on the taxonomic  
426 composition of the neonatal gut microbiome, the main differences in microbial taxa in  
427 both datasets (16S rRNA gene amplicon and metagenomic sequencing data) are  
428 clearly due to delivery mode. Please also refer to the manuscript passages highlighted  
429 above under **comment 2.1**.

430

431 **2.3.** The authors design a method that removes “artefactual” reads - this is useful for  
432 low biomass samples, but are faecal samples from neonates truly low biomass? I think  
433 the method the authors developed is reasonable, but it is interesting to note that most  
434 of the manuscripts that I have read on the topic of neonatal microbiome sequencing  
435 have not treated neonatal faecal samples as “low biomass”. Does the removal of these  
436 “artefacts” result in dramatically different interpretations of the results?

437

438 Also, Regarding the choice of the artefact control sample, I found it interesting and  
439 unusual that Caco-2 cells were used - typically blank water controls are used for the  
440 controls, as mammalian cell culture likely is bacterially-contaminated. I find this  
441 choice rather unconventional.

442

443 **Response:**

444 We appreciate the reviewer’s points on the need for removing artefactual sequences in  
445 case of working on low biomass samples. Given the extended length limitations of  
446 *Nature Communications* (in contrast to the original *Nature* Letter format), we have  
447 expanded on our rationale for the removal of artefactual reads in the revised  
448 manuscript. Briefly, according to our earlier work (doi:10.3389/fmicb.2017.00738),  
449 neonatal stool samples from days 1-5 contain between 0.0001 - 10 ng of microbial  
450 DNA per mg of stool. As discussed in response to the reviewer’s **comment 2.1**.  
451 above, low microbial biomass samples are prone to overrepresentation of artefactual  
452 sequences, which may explain some of the inconsistencies between previous studies.  
453 According to our own results, the removal of artefactual sequences is necessary to  
454 resolve actual signals. More specifically, in our datasets, sequences from  
455 *Achromobacter xylosoxidans* or *Burkholderia* taxa were found to be prominent in



456 both low biomass samples and negative controls and these stem from contaminated  
457 reagents (doi: 10.1186/s12915-014-0087-z; doi: 10.1007/s10096-016-2644-6). Our  
458 protocols allow for the diligent removal of such sequences, which is necessary to  
459 resolve actual microbial community compositions and track strains from mothers to  
460 neonates.

461

462 Given that the influence of artefactual sequences depends on the amount of DNA in  
463 the original sample, we performed titrations with human DNA to assess the overall  
464 complement of contaminant sequences analogous to previous work  
465 (doi:10.3389/fmicb.2017.00738). Please also refer to the manuscript passages  
466 highlighted above under **comment 2.1**.

467

468 The removal of artefactual sequences was performed across all of the analyzed  
469 samples in a consistent manner and this removal was independent of the human  
470 sequences, which were generated to identify artefactual sequences. We do not fully  
471 understand the reviewer's comment about likely contamination of the mammalian cell  
472 culture. Nevertheless, we would like to reassure the reviewer by stressing that the  
473 Caco-2 cells from which the human DNA was extracted were maintained in DMEM  
474 containing pen/strep. Furthermore, the presence of *Mycoplasma* is routinely  
475 monitored in our cell culture lab. Based on these facts and as the metagenomic  
476 sequencing did not include any *Mycoplasma* sequences, we can confidently exclude a  
477 bacterial contamination of the mammalian cell culture and are confident that our  
478 protocol is entirely robust for identifying and removing artefactual sequences.

479

480 [Material and methods, manuscript lines 708 to 712](#): Given that the Caco-2 cells were  
481 cultured in the presence of 1% penicillin–streptomycin, that the routine surveys for  
482 *Mycoplasma* were negative, and that the metagenomic sequencing data did not  
483 include any *Mycoplasma* sequences, any bacterial contamination of the mammalian  
484 cell culture could be confidently excluded.

485

486 **2.4.** In general, it would be nice if the authors pointed to the tools they use for  
487 “binning” (line 74), and identifying “strain-determining variant patterns” (line 75) in  
488 the actual manuscript. Also, how did they “reconstruct” genomes - they mention  
489 MEGAHIT in the methods, but it would be nice to cite this in the actual manuscript.  
490 Many of the references in the bioinformatic analysis section of the main manuscript  
491 appear to be incorrect or misplaced to me: for example, Ref 17 on line 74 appears  
492 incorrect (this referenced paper is not a binning tool as is implied by the location of  
493 the citation). Also, Ref 18 on line 75 appears to be incorrect. PhyloPhlAn is not a  
494 strain-determine variant pattern tool, as is implied by the location of the citation. In  
495 reading the methods, it is clear that the team engaged an experienced  
496 bioinformatician. It would be good if this bioinformatician carefully read over the  
497 main manuscript and checked all citations.

498

499 **Response:**

500 We appreciate the reviewer highlighting the importance for providing full  
501 methodological details. All the methodological details were outlined in the Materials  
502 and Methods section and in accordance with the requirements of *Nature*  
503 *Communications*, a detailed Materials and Methods section now forms an integral part  
504 of the manuscript. Also, we incorporated additional methodological steps that are  
505 important for the understanding into the revised main text where necessary. There  
506 were indeed two wrong citations in the original manuscript in relation to the  
507 bioinformatic analyses, which have been corrected in the revised manuscript.

508

509 **2.5.** The inclusion of a significant proportion of infants who were small for gestational  
510 age (SGA) may have skewed results substantially. These are not healthy, usual, full-  
511 term births and are likely biological outliers. What is the justification/reasoning for  
512 inclusion of this group in the study? It was not clear to me.

513

514 **Response:**

515 We thank the reviewer for the comment on infants that were born small for gestational  
516 age (SGA). As detailed in the original manuscript, SGA neonates were included in the  
517 study as this condition typically coincides with caesarean delivery. In addition,  
518 neonates born SGA have an elevated propensity for developing metabolic disorders  
519 during childhood or adulthood, and this elevated risk has been linked to changes in  
520 the gut microbiome (doi:10.1186/2049-2618-2-38). Given that CSD may be linked to  
521 SGA and that early changes to the microbiome may be at the origin of later-life  
522 conditions, SGA infants were explicitly included to compare patterns observed in  
523 them against non-SGA CSD neonates. Although the original manuscript included  
524 references to the rationale, this was not explicit due to length limitations. In  
525 accordance with the reviewer's comment, we have included additional explanations  
526 on the rationale for including neonates born SGA in the revised manuscript.

527

528 Introduction, manuscript lines 76 to 81: Although CSD is not associated with  
529 improved health outcomes, being born small for gestational age (SGA) frequently  
530 coincides with CSD (i.e. more than 50% of all SGA neonates)<sup>22,23</sup>. SGA neonates  
531 have an elevated propensity for developing metabolic disorders during childhood or  
532 adulthood, which has been associated with alterations to the gut microbiome<sup>22,24</sup>, and  
533 may be linked to the elevated rate of CSD in this population.

534

535 Discussion, manuscript lines 428 to 432: Based on all analyses, no differences in  
536 taxonomical compositions or functional potentials were apparent when comparing  
537 CSD and CSD+SGA neonates, suggesting that the impact of delivery mode was a  
538 stronger determinant for neonatal gut microbiome colonization than the SGA status.

539

540 **2.6.** For the LPS extraction, how did the authors account for samples where adequate  
541 LPS could not be extracted? Are we to conclude that LPS was absent? Did the authors

542 measure the amount of LPS in the samples using methods such as targeted Mass spec?  
543 I am concerned that the size of the cohort studied and the limitations of not being able  
544 to extract LPS from all samples limits the generalizability of the findings presented.  
545 Also, why would babies born by VD have “higher immunostimulatory potential” than  
546 those born by CSD? A discussion of the expected impact of this observation would be  
547 helpful. Also, in the methods, it seems that of the 13 neonatal faecal samples, only 11  
548 produced measurable quantities of LPS. In the main manuscript, I read this section as  
549 suggesting that 13 samples produced measurable quantities of LPS. Were samples that  
550 did not produce LPS from the VD, CSD or CSD+SGA cohorts? Why were only some  
551 of the total samples available for LPS extraction?

552

553 **Response:**

554 We appreciate the reviewer’s reflections on the isolated LPS fractions and thank the  
555 reviewer for the suggested additional experiments to strengthen the study. The fact  
556 that sufficient LPS could not be isolated from samples can be explained by the limited  
557 amounts of faecal samples that were obtainable. This does not mean that LPS was  
558 absent in the samples collected from these neonates at the specific time points. Given  
559 that the amounts of sample material which can be collected from neonates on days 1-5  
560 were very limited and that large parts of the limited sample material was used for  
561 DNA extraction, sufficient sample material was simply not left for LPS extraction  
562 (the method requires 150 mg of material to result in sufficient LPS for downstream  
563 analyses). Consequently, no data was obtainable for these samples. The amount of  
564 LPS was quantified using state-of-the-art methods and we have now included  
565 additional information on the characterization of the LPS fractions in the revised  
566 manuscript (see also our detailed responses to **comment 3.4.** below). Although we  
567 investigated analysis of LPS by mass spectrometry as per the reviewer’s suggestion,  
568 such an analysis was not possible due to the very high amount of LPS needed, which  
569 is not easily obtainable for early neonatal stool samples. Given the fact that LPS  
570 moieties are highly diverse, such analyses would have not provided any conclusive  
571 qualitative information and accurate quantification via chromatography coupled to  
572 mass spectrometry would have also not been possible. In contrast, we have applied  
573 additional, in our opinion more relevant, assays involving agarose gel electrophoresis  
574 and reporter cell lines to further characterize the obtained LPS fractions (see also our  
575 detailed response to **comment 2.9.** below).

576

577 In order to address the reviewer’s concern regarding the generalizability of the results,  
578 we have included data from additional samples in the revised manuscript, which,  
579 along with the more detailed characterizations of the LPS fractions, support our  
580 original conclusions. Collectively, we now present isolated LPS mixtures from faecal  
581 samples collected at day 3 postpartum from a total of 16 neonates (7 VD, 7 CSD, 2  
582 CSD + SGA). The apparent “higher immunostimulatory potential” of the early  
583 microbiome in VD neonates is, according to the results in the original manuscript and  
584 supported by the new data, due to the higher numbers of Gram-negative bacteria and  
585 the enrichment of the LPS biosynthesis pathway in the gut microbiome of VD

586 neonates. In order to clarify this point, we have included an additional section in the  
587 revised manuscript. The reason for only some samples producing measurable  
588 quantities of LPS has been described and clarified in the revised manuscript. Please  
589 also refer to revised text passages cited under **comment 1.2**.

590

591 Results, manuscript lines 298 to 303: Notably, in the case of vaginal delivery,  
592 multiple strains of Gram-positive bacteria (e.g. *Bifidobacterium*) were transferred  
593 from mother to neonate (Fig. 3a; transmission in 71% of all VD neonates, 0% in CSD  
594  $\pm$  SGA on days 3 and 5), as well as Gram-negative bacteria (e.g. Bacteroidetes; Fig.  
595 3a; transmission in 79% of all VD neonates, 0% in CSD and 20% in CSD+SGA on  
596 days 3 and 5).

597

598 Results, manuscript lines 353 to 362: As LPS forms part of the outer membrane of  
599 Gram-negative bacteria, the attributed Gram staining information of microorganisms  
600 directly corresponds to their propensity to synthesize LPS. Importantly, LPS is a  
601 highly potent innate immune activator that is recognized by the Toll-like receptor  
602 (TLR) 4. The earliest VD gut microbiome exhibited an enrichment in the microbial  
603 LPS biosynthesis pathway (Fig. 2a and Fig. 3h) as well as in Gram-negative taxa,  
604 which were frequently transmitted from the mother (Fig. 3a). This observation is  
605 supported by the 16S rRNA gene amplicon sequencing data (Supplementary Fig. 3b).  
606 Consequently, an apparent higher microbial synthesis of LPS likely results in an  
607 increased immunostimulatory potential of the developing gut microbiome.

608

609 Discussion, manuscript lines 502 to 512: Independent of the precise mechanism of  
610 strain transfer, we observed that several functional pathways were significantly under-  
611 represented in CSD neonates, while these were in turn enriched in VD neonates and  
612 linked to vertically transmitted strains, in particular the LPS biosynthesis pathway  
613 (Fig. 2a). LPS, an outer surface membrane component of Gram-negative bacteria,  
614 promotes the secretion of pro-inflammatory cytokines and thereby sits at the interface  
615 of the earliest gut microbiome colonization and neonatal immune priming. Following  
616 the apparent enrichments in LPS biosynthesis in VD neonates due to higher amounts  
617 of Gram-negative bacteria, the subsequent extraction and quantification of LPS from  
618 neonatal stool and stimulation of primary human immune cells therewith  
619 demonstrated a reduced immunostimulatory potential of the earliest gut microbiome  
620 in CSD neonates.

621

622 **2.7.** Given the very small n here, it seems that the results are depicted are of limited  
623 strength and may be very susceptible to over-interpretation.

624

625 **Response:**

626 We analyzed the data from faecal samples from additional samples and have included  
627 the results in the revised manuscript. The analyses from the additional samples  
628 support the original results and conclusions. Please also refer to **comment 1.2** for

629 additional details.

630

631 **2.8.** Furthermore, based on Figure 4, it appears that *Escherichia* is highly abundance  
632 in all but one VD individual. Has this been described in other studies? Is this what is  
633 driving the LPS abundance in these samples? If so, this is worth discussing in the  
634 manuscript and putting into context for the readers. I would read the figure as  
635 *Escherichia* species being highly abundant in the neonatal microbiome of VD infants  
636 and that this may have consequences for LPS production. Is the *E. coli* that is present  
637 in these individuals the strain(s) that is from the mother? Based on Figure 3a, it does  
638 not appear so, as best as I can tell. So is one to conclude that VD neonates have a high  
639 abundance of *E. coli* that produces immunostimulatory LPS, but that the likely  
640 producer of this LPS (*E. coli*, which is abundant), is not vertically transmitted? If this  
641 interpretation is correct, I am not sure how the two main thrusts of the manuscript link  
642 to one another. Another area of confusion for me is Fig2C. In the neonatal stool from  
643 day 3, which I believe was used for the LPS extraction, I do not see many samples  
644 that have abundant *Escherichia*, as would be expected from Figure 4 - in fact, the  
645 samples that were chosen from the VD cohort for the LPS study appear to be the only  
646 two VD samples that have detectable *E. coli*. This may be skewing the results.

647

648 **Response:**

649 We thank the reviewer for this detailed comment. The apparent difference in the  
650 abundance of *Escherichia coli* across the different VD neonates (Figure 4) was  
651 highlighted in the original manuscript. According to our results, *E. coli* must indeed  
652 be important for early LPS-based immunostimulation in many neonates but not all.  
653 According to our results (Figure 3a), other Gram-negative bacteria, which contribute  
654 to the isolated LPS mixtures and were transmitted from mothers to VD neonates, may  
655 occupy the same role (Figure 3h). For the revision of the manuscript, we have  
656 performed additional measurements, in particular qPCR analyses to quantify *E. coli*  
657 abundances (see paragraph below) that allow us to validate these findings. The  
658 additional data has been included in the manuscript to clarify this point. In the revised  
659 manuscript, we have discussed the apparent importance of *E. coli* as well as other  
660 Gram-negative bacteria with respect to LPS-mediated immune stimulation early on in  
661 life. Accordingly, we have included a supplementary note on the potential effect of *E.*  
662 *coli* abundance and linked immunostimulatory potential in the revised manuscript.

663

664 [Supplementary Information, Supplementary note 6: LPS from VD neonate C117, in](#)  
665 [whom the microbiome displayed lower presence of Gram-negative bacteria based on](#)  
666 [16S rRNA gene amplicon sequencing data and the lowest amounts of \*E. coli\*](#)  
667 [according to qPCR measurements, also had the lowest immunostimulatory potential](#)  
668 [among all VD neonates, and triggered a negligible cytokine response. Although a](#)  
669 [higher \*E. coli\* abundance appeared to coincide with an increased immunostimulatory](#)  
670 [potential of the isolated LPS, the proportion of \*E. coli\* alone was not sufficient to](#)  
671 [explain the lack of immunostimulative effects in CSD \( \$\pm\$ SGA\) neonates. More](#)

672 specifically, in five cases of faecal samples collected from CSD+SGA, the absolute  
 673 abundance of *E. coli* was at least 25-fold increased when compared to the faecal  
 674 sample collected from VD neonate C007, which triggered an immune response (Fig.  
 675 4a). However, the isolated LPS from these five samples did not result in any  
 676 considerable immune response in terms of TNF- $\alpha$  production. Additionally, in CSD  
 677 neonate C121, the microbiome was depleted of *E. coli*, while the extracted LPS  
 678 fraction still triggered an immune response. At the same time, CSD+SGA neonate  
 679 C119 was depleted of *E. coli* but had a high proportion of Gram negative bacteria  
 680 overall, while the LPS extract only triggered a minimal immune response in some of  
 681 the MoDCs from adult donors. Collectively, these observations indicate that the  
 682 composition of the isolated LPS fractions has an important role in their activity as  
 683 well.

684  
 685 As Figure 4 was based on samples for which no metagenomic data was available at  
 686 that time, the proportion of *E. coli* was derived from the 16S rRNA gene amplicon  
 687 sequencing data and not metagenomic sequencing data. We have now performed  
 688 additional qPCR analyses for assessing the actual proportions of *E. coli* per sample,  
 689 which are included in the Figure 4 of the revised manuscript. According to the  
 690 additional data, we have 7 faecal samples from VD neonates collected on day 3 for  
 691 which 5 out of 7 include an increased proportion of *E. coli* (resolved based on mOTU  
 692 analysis as well). Therefore, the presence of *E. coli* in samples collected from VD  
 693 neonates are unlikely to skew the results but represent a common trait in the gut  
 694 microbiome of VD neonates at day 3. These results have been included and discussed  
 695 in the revised manuscript.

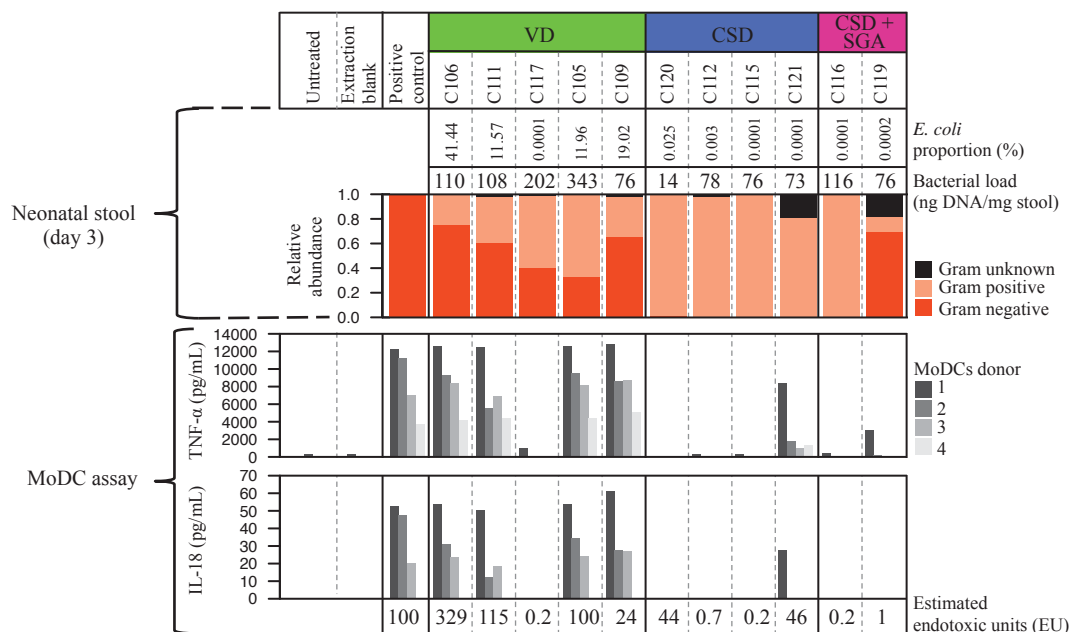

696 **Figure 4 | Cytokine measurements in monocyte-derived dendritic cells after**  
 697 **stimulation with isolated LPS from neonatal stool and in neonatal plasma. a,**

698 Lipopolysaccharide (LPS) was isolated from faecal samples collected on day 3  
699 postpartum from neonates in vaginal delivery (VD), caesarean-section delivery (CSD)  
700 and CSD with small for gestational age (SGA) status (CSD+SGA) groups, and  
701 incubated for 24 h with human monocyte-derived dendritic cells (MoDCs) isolated  
702 from a total of 12 adult donors. Exact numbers of donors used per sample are given in  
703 the plot. Positive control: isolated LPS from *E. coli* overnight culture. Neonates C115  
704 and C116 are twins. **b**, Plasma levels of TNF- $\alpha$  and IL-18 in samples collected at day  
705 3 after birth from VD and CSD ( $\pm$  SGA) neonates. Comparison by Wilcoxon rank-  
706 sum test with multiple testing adjustment; \*false discovery rate (FDR)-adjusted  $P$   
707  $<0.05$  and \*\*(FDR)-adjusted  $P <0.01$ . Circles correspond to neonates with  
708 metagenomic data, crosses represent neonates without metagenomic data.  
709

710 **2.9.** How was the LPS concentration and purity determined for each LPS sample that  
711 was extracted from faeces determined? The effects that they saw may have to do  
712 largely with purity of the LPS as opposed to structural differences / immunogenicity  
713 of the LPS. I would be more convinced of the argument they are trying to make if  
714 each of the LPS samples had been subjected to mass spectrometry to evaluate purity,  
715 for example. I simply worry that the LPS extraction procedure is, in itself, very  
716 flawed and subject to error. And with such a small  $n$ , the results may not be terribly  
717 robust, even if intriguing.

718  
719 **Response:**

720 We appreciate the reviewer's concern regarding the purity of the extracted LPS  
721 fractions. As already partially discussed in response to **comment 2.6.**,  
722 chromatography followed by mass spectrometric analysis could not be performed as  
723 high amounts of LPS are needed which we could not obtain because neonatal faecal  
724 samples are low biomass. Additionally, such analyses would not provide any  
725 conclusive qualitative information and accurate quantification via chromatography  
726 coupled to mass spectrometry would also not be possible. Nevertheless, to address the  
727 reviewer's concerns, we have performed additional quantitative and qualitative  
728 characterizations of the LPS fractions (including from samples from additional  
729 neonates) using the assays detailed below. In accordance to the reviewers' comment  
730 and **comment 3.4.**, we have included the results of additional analyses in the  
731 manuscript.  
732

733 The concentration of LPS was determined using a state-of-art ELISA-based endotoxin  
734 detection assay (Endolisa; # 609033, Hyglos GmbH, Germany). Detailed qualitative  
735 assessments of the LPS fractions were performed using standard agarose gel  
736 electrophoresis (to exclude the presence of DNA contamination) combined with  
737 Coomassie (to exclude protein contamination) as well as silver staining (to visualize  
738 LPS). To assess the immunogenicity as well as the purity of the LPS fractions, we  
739 have included the results of additional analyses in the revised manuscript including:  
740 (i) stimulation of primary dendritic cells with additional purified LPS, and (ii)

741 stimulation of specific HEK blue reporter cell lines overexpressing, either hTLR4  
742 (#HKB-HTLR4, InvivoGen), hTLR2 (#HKB-HTLR2, InvivoGen) or hNOD1  
743 (#HKB-HNOD1, InvivoGen) or hNOD2 (#HKB-HNOD2, InvivoGen). The results of  
744 these additional experiments demonstrate that: (i) the protocol for LPS extraction and  
745 purification results in pure LPS fractions when compared to commercially available,  
746 pure LPS; (ii) no immunological stimulation of dendritic cells was observed which  
747 would be attributable to DNA; (iii) if LPS was used at a defined concentration for all  
748 samples, only hTLR4 was activated and not hTLR2, nor hNOD1 or hNOD2; (iv) if  
749 isolated LPS was used at sample-specific concentrations to mimic realistic *in vivo*  
750 conditions, LPS mixtures were still relatively pure and comparable to commercially  
751 available LPS (Sigma) as hNOD1 and hNOD2 were in both cases not activated. In  
752 samples that were highly enriched in LPS also hTLR2 was activated, which was also  
753 the case for commercially available, pure LPS. Finally, in case a minimal amount of  
754 endotoxin unit (EU) of LPS was used to stimulate dendritic cells, the TNF- $\alpha$  response  
755 did not correlate with a linearly increasing amount of both LPS and TNF- $\alpha$ ,  
756 suggesting that indeed the composition of the different isolated LPS mixtures does  
757 play a role in the immune response. Based on the immunogenicity of the purified LPS  
758 fractions, additional factors may be at play, however the detailed elucidation thereof  
759 goes beyond the scope of this study. In this context, we would like to stress again that  
760 the present work represents the first study to show a difference in  
761 immunostimulatory potential of the earliest gut microbiome between VD and CSD  
762 neonates and during a critical window of opportunity for immune system priming.  
763 More detailed future work will be necessary to elucidate the different molecular  
764 factors involved in immune system priming. With regards to the reviewers'  
765 comments, we have now included an additional supplementary note and figures on all  
766 additional experiments that were conducted to properly assess the purity and  
767 immunogenicity of the isolated LPS mixtures from neonatal stool samples.

768

769 Material and methods, manuscript lines 972 to 1013: In order to verify the purity of  
770 the extracted LPS fractions, HEK-Blue™ reporter cell lines over-expressing one of  
771 the receptors hTLR2, hTLR4, NOD1 or NOD2 (InvivoGen, France), were stimulated  
772 with LPS extracted from five selected neonatal faecal samples (three VD and two  
773 CSD), which presented sufficient amounts of extractable LPS. HEK-Blue™ TLR and  
774 NOD cells are designed to detect stimulants of the human receptors by induction of  
775 secreted embryonic alkaline phosphatase (SEAP). For all the cell lines, the levels of  
776 SEAP were determined with HEK-Blue™ Detection (InvivoGen, France), a cell  
777 culture medium that allows for real-time detection of SEAP.

778

779 While the hTLR4 receptor only recognizes LPS, hTLR2 recognizes peptidoglycan,  
780 lipoteichoic acid and lipoprotein from gram-positive bacteria, lipoarabinomannan  
781 from mycobacteria, and zymosan from the yeast cell wall, the receptor NOD1 binds to  
782 bacterial molecules containing the D-glutamyl-meso-diaminopimelic acid (iE-DAP)  
783 moiety and NOD2 recognizes bacterial molecules (peptidoglycans) and stimulates an  
784 immune reaction. HEK-Blue™ cells were grown and maintained in DMEM (4.5 g/L



785 glucose, L-glutamine, Sigma-Aldrich, Belgium), supplemented with 10% foetal  
786 bovine serum (Thermo Fisher Scientific), 1% penicillin–streptomycin (Sigma-  
787 Aldrich, Belgium), 100 µg/ml Normocin (InvivoGen, France) and respective selective  
788 antibiotics according to the user’s manual.

789

790 To monitor the activation of NF-κB, HEK-Blue™ cells were seeded according to the  
791 user’s manual in HEK-Blue™ Detection medium (InvivoGen, France), in flat-bottom  
792 96-well plates and stimulated for 22 hours with LPS samples. We used two  
793 conditions: first, using the same concentration of LPS, where 1 µl of extracted LPS  
794 (0.01 ng/µl) was added per well, and second, using the same volume of LPS, where  
795 7.5 µl extracted LPS was added to 10<sup>5</sup> HEK-Blue™ cells. To convert endotoxin  
796 activity (EU) into mass (ng), we considered that around 10 EU are equivalent to 1 ng  
797 endotoxin<sup>81</sup>. For positive controls, HEK-Blue™ NOD1 cells were stimulated with 1  
798 µl TriDAP (10 µg/µl, InvivoGen, France), HEK-Blue™ NOD2 cells with 1 µl  
799 Murabutide (10 µg/µl, InvivoGen, France), HEK-Blue™ hTLR2 cells with 1 µl of  
800 Pam3CSK4 (1 µg/µl; InvivoGen, France) and HEK-Blue™ hTLR4 cells with 1 µl  
801 ultrapure LPS (5 µg/µl, source strain: ATCC 12014; CDC 5624-50 [NCTC 9701],  
802 InvivoGen, France). In addition, all cell lines were treated with 1 µl ultrapure LPS (5  
803 µg/µl, InvivoGen, France) and 1 µl ultrapure LPS (0.01 ng/µl, InvivoGen, France) as  
804 well as with commercially available LPS (standard LPS; *Escherichia coli* O55:B5,  
805 gel-filtration chromatography; Sigma-Aldrich, Belgium): 1 µl of 5 µg/µl and 1 µl of  
806 0.01 ng/µl. For the negative control, HEK-Blue™ cells were incubated with 1 µl of  
807 endotoxin-free H<sub>2</sub>O (InvivoGen, France). All conditions were performed in duplicates  
808 and SEAP expression was monitored using a microplate reader at 655 nm (Biotek  
809 instruments, Germany) except for LPS isolated from C117 where only 7.5 µl  
810 extracted LPS/10<sup>5</sup> HEK-Blue™ cells was added to the cells and tested in duplicates.

811

812 Results, manuscript lines 368 to 388: We isolated LPS from faecal samples with  
813 sufficient biomass collected on day 3 postpartum from 16 neonates (7 VD, 7 CSD, 2  
814 CSD+SGA; Supplementary Data 12; Methods) and used several approaches to assess  
815 the purity of the isolated LPS fractions (Supplementary Note 5; Methods). Using  
816 agarose and polyacrylamide gel electrophoresis, we successfully visualized the  
817 isolated LPS and did not find traces of protein contamination but observed minor  
818 traces of fragmented DNA. However, this DNA did not contribute considerably to the  
819 immunostimulatory effect of the LPS fractions (Supplementary Fig. 11). No  
820 contamination with peptidoglycan or other bacterial molecules containing the D-  
821 glutamyl-meso-diaminopimelic acid moiety were detected in the isolated LPS  
822 fractions using the highly sensitive HEK-Blue™ reporter cells overexpressing the  
823 receptors hTLR2, hNOD1 and hNOD2, respectively (Supplementary Fig. 12;  
824 Methods). Some microbial products detected by hTLR2 (e.g. lipoteichoic acid,  
825 lipoprotein from Gram-positive bacteria, lipoarabinomannan from Mycobacteria or  
826 zymosan from yeast cell walls) were likely present in LPS samples for which high  
827 amounts of LPS were obtained from faecal samples. Conclusively, the isolated LPS  
828 fractions were assessed to be of high purity based on the HEK-Blue™ cell assays,

829 although some unknown microbial products may play a stimulatory role in the high  
830 yield LPS fractions (1 ng of standard LPS and an average of 2.9 ng of LPS isolated  
831 from VD neonates; Supplementary Fig. 12). Consequently, the composition of the  
832 different isolated LPS fractions played an important role in the subsequently triggered  
833 immune response.

834

835 Supplementary Information, Supplementary Note 5: To assess the LPS purity, we  
836 performed detailed characterizations of the obtained LPS fractions. First, we used  
837 agarose gel electrophoresis to exclude the presence of DNA contamination  
838 (Supplementary Fig. 11a) with the subsequent extraction of DNA from excised  
839 agarose bands and measurement of TNF- $\alpha$  in the supernatant of MoDCs upon  
840 stimulation (Supplementary Fig. 11b). Our results confirmed that DNA contamination  
841 did not considerably contribute to the observed immune activation of MoDCs.  
842 Second, we used polyacrylamide gel electrophoresis combined with Coomassie  
843 staining in order to successfully exclude the presence of proteins (Supplementary Fig.  
844 11c). Third, we visualized LPS using polyacrylamide gel electrophoresis followed by  
845 silver staining (Supplementary Fig. 11d).

846

847 To further assess the immunogenicity as well as the purity of the LPS fractions, we  
848 performed additional stimulation assays using specific HEK-Blue™ reporter cell lines  
849 which overexpressed either hTLR4, hTLR2, hNOD1 or hNOD2 (Supplementary Fig.  
850 12a to d). In summary, when LPS was used at a defined concentration for all samples,  
851 only hTLR4 was activated and not hTLR2, nor hNOD1 or hNOD2; if isolated LPS  
852 was used at sample-specific concentrations to mimic realistic *in vivo* conditions, LPS  
853 mixtures were still relatively pure and comparable to commercially available LPS  
854 (Sigma) as hNOD1 and hNOD2 were in both cases not activated. In samples that were  
855 highly enriched in LPS also hTLR2 was activated, which was also the case for the  
856 commercially available, pure LPS. Finally, in case a minimal amount of endotoxin  
857 unit (EU) of LPS was used to stimulate dendritic cells, the TNF- $\alpha$  response did not  
858 correlate with a linearly increasing amount of both LPS and TNF- $\alpha$ , suggesting that  
859 indeed the composition of the different isolated LPS mixtures does play the dominant  
860 role in the observed immune responses.

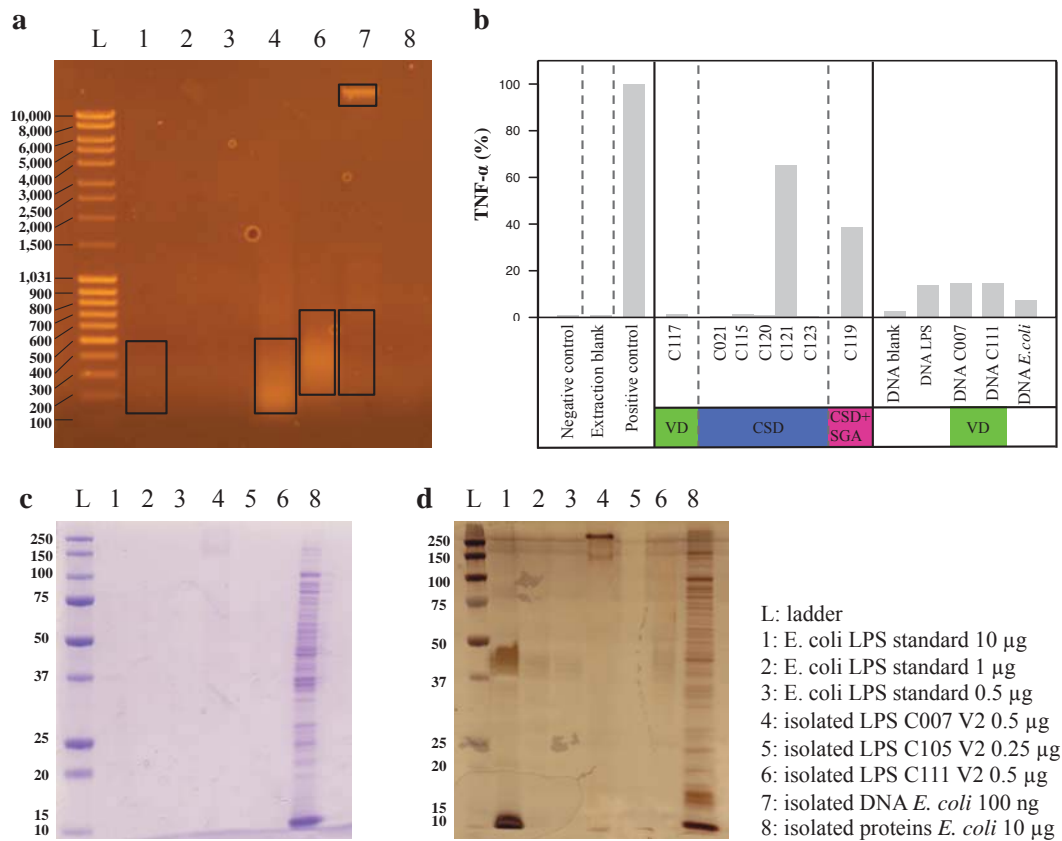

861 **Supplementary Figure 11 | Purity assessment of isolated LPS fractions from**  
 862 **neonatal stool.** **a**, Agarose gel electrophoresis with Ethidium bromide staining to  
 863 visualize the presence of DNA contamination in LPS fractions that were isolated from  
 864 neonatal faecal samples. Agarose bands at the highlighted sizes were cut and DNA  
 865 was isolated. **b**, Stimulation of human monocyte-derived dendritic cells (MoDCs)  
 866 from adult donor 9 with extracted DNA samples obtained from (a). Immune reaction  
 867 was measured by levels of TNF- $\alpha$  in the supernatant. Untreated MoDCs were used as  
 868 negative control, while MoDC stimulation with 15 endotoxin units (EU) of LPS  
 869 isolated from an overnight culture of *Escherichia coli* strain K-12 (sub-strain  
 870 MG1655) were used as positive control. **c**, Poly-acrylamide gel electrophoresis  
 871 combined with Coomassie staining to visualize protein contamination. **d**, Poly-  
 872 acrylamide gel electrophoresis combined with silver staining to visualize LPS  
 873 presence.  
 874  
 875

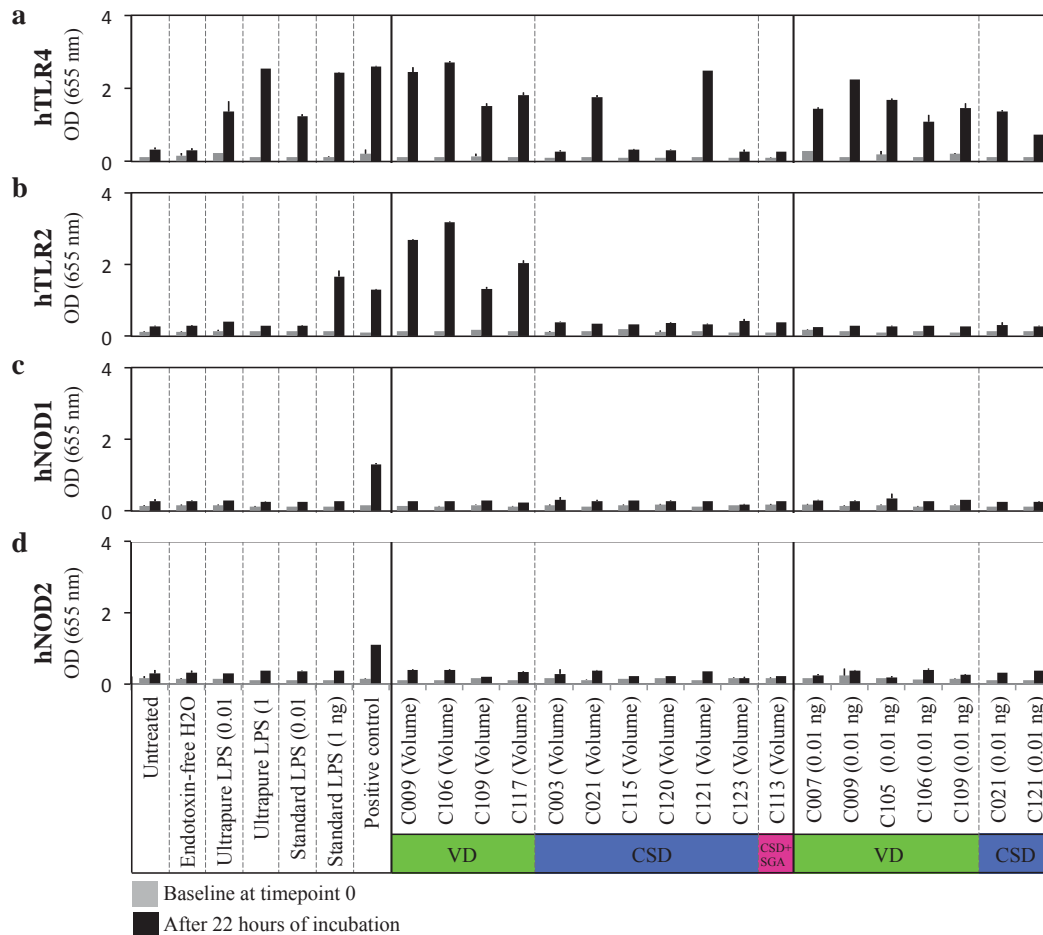

876 **Supplementary Figure 12 | Immune stimulation assays of reporter cell lines after**  
 877 **stimulation with isolated LPS from neonatal stool.** Read-outs of HEK-Blue cell  
 878 cell lines overexpressing respectively one of the membrane receptors hTLR4 (a), hTLR2  
 879 (b), NOD1 (c) or NOD2 (d) were stimulated with LPS fractions isolated from  
 880 neonatal faecal samples. a, The hTLR4 receptor only recognizes LPS. Positive  
 881 control: ultrapure LPS (5 µg). b, The hTLR2 receptor recognizes peptidoglycan,  
 882 lipoteichoic acid and lipoprotein from gram-positive bacteria, lipoarabinomannan  
 883 from mycobacteria, and zymosan from yeast cell wall. Positive control: Pam3CSK4  
 884 (1 µg). c, The NOD1 receptor binds to bacterial molecules containing the D-glutamyl-  
 885 meso-diaminopimelic acid (iE-DAP) moiety. Positive control: TriDAP (10 µg). d,  
 886 The NOD2 receptor recognizes bacterial molecules (peptidoglycans) and stimulates  
 887 an immune reaction. Positive control: Murabutide (10 µg). OD: optical density.  
 888 Technical duplicates were done per condition and error bars reflect the standard  
 889 deviation between duplicates.

890

### 891 **Minor comments**

892 We thank the reviewer for the valuable input. We address the important minor  
 893 comments in the following sections but all the reviewer's minor comments have been  
 894 comprehensively addressed in the revised version of the manuscript.

895

896 **2.10.** Not enough detail in the manuscript - how were differentially abundant

897 functional categories from KEGG identified? I appreciate the strict space limitations,  
898 but some information regarding method should be included in the manuscript.

899

900 **Response:**

901 We appreciate the reviewer's concern over the apparent lack of methodological  
902 details outside the material and methods section of the manuscript. Differentially  
903 abundant functional categories from KEGG were identified using the Deseq2 package  
904 using the R statistical package, while differentially abundant pathways were detected  
905 through pathway enrichment analysis using a custom R script according to  
906 doi:10.1038/nmicrobiol.2016.180. Due to previous space limitations, we refrained  
907 from adding too many details on the methods into the main text of the manuscript.  
908 However, we have now included as much methodological information as needed in  
909 the revised main text.

910

911 **2.11.** The authors refer to how the “early microbial functions in VD neonates reflected  
912 the mothers’ functional microbiome profiles” on line 86-87, but they have not yet  
913 introduced any analysis of the mother’s microbiome. This is confusing to me. Also,  
914 are they looking at the maternal vaginal microbiome or the maternal stool microbiome  
915 (both of which have been correlated with the neonatal microbiome). Did they look at  
916 the neonatal faecal microbiome and the maternal skin microbiome to compare  
917 functional potential? This would be suggested by Dominguez-Bello’s paper from  
918 PNAS 2010.

919

920 **Response:**

921 The analysis of maternal gut microbiome was first mentioned in the introductory  
922 paragraph, but we agree with the reviewer that an additional mention of the different  
923 maternal samples that were analyzed should be added earlier in the main text. In our  
924 study, we assessed the maternal vaginal and stool microbiome through metagenomic  
925 sequencing, however the earliest gut functional potential of VD neonates resembled  
926 significantly more the functional potential of the maternal gut than vaginal  
927 microbiome, which is why Figure 2 only includes the maternal gut microbiome data.  
928 We have referred to this this more precisely in the revised manuscript.

929

930 Results, manuscript lines 206 to 224: To assess whether the apparent taxonomic  
931 differences between the gut microbiomes of VD and CSD neonates are reflected at the  
932 level of functional potential, we used the metagenomic sequencing data to compare  
933 functional profiles of all neonates to the gut microbial potential of their respective  
934 mothers. We also compared the CSD ( $\pm$ SGA) microbiota at day 3 and day 5  
935 postpartum to those of VD neonates. The correlations of the functional profiles of the  
936 neonatal gut microbiome to the respective maternal vaginal microbiome were lower  
937 (median rho 0.06 for day 1, 0.37 for day 3 and 0.44 for day 5) than the correlation  
938 between neonatal and maternal gut microbiomes (median rho 0.29 for day 1, 0.59 for  
939 day 3 and 0.62 for day 5). While the correlations of the functional profiles of the

940 neonatal gut microbiome and the maternal vaginal microbiome did not differ  
941 significantly between delivery modes, early microbial functions in VD neonates better  
942 reflected the mothers' functional gut microbiome profiles compared to CSD ( $\pm$  SGA)  
943 neonates (Fig. 2a; Wilcoxon rank-sum test, FDR-adjusted  $P = 4.1 \times 10^{-3}$  for day 3).  
944 CSD ( $\pm$  SGA) neonates lacked most functions at day 3 compared to VD neonates  
945 (Supplementary Fig. 4-9), while some appeared at day 5 (Fig. 2a). Notably, neonatal-  
946 maternal correlations between community-wide functional potentials of the gut  
947 microbiomes at days 1, 3 and 5 postpartum were higher for VD than for CSD ( $\pm$   
948 SGA) (Fig. 2b; Wilcoxon rank-sum test, FDR-adjusted  $P = 6.0 \times 10^{-3}$  for day 3 and  $P$   
949  $= 1.8 \times 10^{-2}$  for day 5).

950

951 As the composition and diversity of the skin microbiome is highly dependent on body  
952 site, it would be improbable to get a complete assessment of skin-to-neonate strain  
953 transfer, which is why we focused on the two microbially rich body sites that are  
954 known for taking an important role in neonatal gut colonization (i.e. maternal gut and  
955 vaginal microbiomes). With regards to the reviewer's comment, we have included our  
956 reasoning in the revised manuscript.

957

958 Results, manuscript lines 136 to 139: For each mother-neonate pair, we sampled  
959 microbiomes of maternal body sites, which are indicated to be important in relation to  
960 neonatal gut colonization (collection of stool and vaginal swabs; Methods) less than  
961 24 h before delivery.

962

963 **2.12.** The methods applied in Supplementary note 3 (to determine if birth method  
964 affected the microbiome) are not adequately explained and do not appear to be  
965 statistically driven. What is presented is not adequate to conclude that “the different  
966 feeding regimes of neonates did not explain the functional differences ...” on lines  
967 94-95.

968

969 **Response:**

970 We thank the reviewer for the valuable comment. Although it may not be completely  
971 excluded that the milk feeding regimen had an effect on the neonatal microbiome at  
972 day 5 after birth, according to the multivariate statistical analyses, delivery mode was  
973 the main factor at the origin of observed effects at day 3 after birth. These additional  
974 results are discussed in the revised manuscript.

975

976 Supplementary Information, Supplementary Note 4: Feeding regime was found to be  
977 a potential contributing factor of the relative abundances of *Trichococcus* (formula  
978 feeding and mixed feeding regime;  $Q = 3.6 \times 10^{-3}$  and  $Q = 4.6 \times 10^{-2}$ ), *Escherichia-*  
979 *Shigella* (mixed feeding regime;  $Q = 1.3 \times 10^{-2}$ ) and one OTU belonging to *Rothia*  
980 (formula feeding regime;  $Q = 2.9 \times 10^{-4}$ ).

981

982 **2.13.** It seemed like the LPS biosynthesis gene was “cherry-picked” from a list of

983 significantly differentially abundant genes. Also, what as the FDR cutoff? Why was  
984 this gene chosen? What were the most significantly differentially abundant genes?

985

986 **Response:**

987 The enriched microbial pathway ‘LPS biosynthesis’ comprises several genes, which  
988 are statistically significantly different between CSD and VD. The pathway of LPS  
989 biosynthesis was specifically chosen for further validation because (i) this pathway  
990 harbors the potential to be closely involved in the earliest priming of the neonatal  
991 immune system during the crucial window of opportunity in early neonatal life and  
992 early exposure to LPS may have persisting effects on the later health status. (ii)  
993 Established methods exist for isolating LPS and performing informative experiments.  
994 In the revised manuscript, we have included a supplementary note on the other  
995 differentially abundant functional pathways.

996

997 Results, manuscript lines 240 to 250: Other important microbial metabolic pathways,  
998 which were enriched with differentially abundant genes between VD and CSD,  
999 included flagellar assembly (Fig. 2a; hypergeometric test, FDR-adjusted  $P = 4.9 \times$   
1000  $10^{-12}$ ), bacterial chemotaxis (Fig. 2a; hypergeometric test, FDR-adjusted  $P = 1.5 \times$   
1001  $10^{-2}$ ), cationic antimicrobial peptide (CAMP) resistance (Fig. 2a; hypergeometric test,  
1002 FDR-adjusted  $P = 4.0 \times 10^{-3}$ ), two-component system (Fig. 2a; hypergeometric test,  
1003 FDR-adjusted  $P = 2.5 \times 10^{-5}$ ) and ABC transporters (Fig. 2a; hypergeometric test,  
1004 FDR-adjusted  $P = 1.3 \times 10^{-4}$ ). Notably, all pathways also showed higher relative gene  
1005 abundances in VD compared to CSD ( $\pm$  SGA) neonates except for the ABC  
1006 transporter pathway (Fig. 2c; Wilcoxon rank-sum test, FDR-adjusted  $P = 4.1 \times 10^{-3}$ ,  
1007  $3.8 \times 10^{-2}$ ,  $2.2 \times 10^{-4}$ ,  $2.1 \times 10^{-2}$ , respectively).

1008

1009 Discussion, manuscript lines 544 to 573: Apart from LPS biosynthesis, other  
1010 pathways that were significantly enriched in the gut microbiome of VD neonates  
1011 included genes involved in membrane transport, i.e. ATP-binding cassette (ABC)  
1012 transporters. On the one hand this may reflect the adaptation of the colonizing  
1013 microbiome of VD neonates to the gut environment through enhanced nutrient intake.  
1014 On the other hand, associated ABC transporter proteins for both Gram-positive and  
1015 Gram-negative bacteria were previously shown to be immunogenic<sup>51</sup>, which could  
1016 suggest an implication in the activation of the neonatal immune system. Additionally,  
1017 enrichments in pathways relating to bacterial motility were observed. This included  
1018 the two-component system pathway, which is an important mediator of signal  
1019 transduction, flagellar assembly and bacterial chemotaxis. More specifically, these  
1020 pathways are essential for bacterial motility in response to external stimuli and  
1021 consequently competition with other members of the gut microbiome<sup>52</sup>. Additionally,  
1022 flagellin, the main structural component of the flagellum, is an effective stimulator of  
1023 innate immunity<sup>53</sup> and promotes mucosal immunity through the activation of TLR5  
1024 (ref 54). Another functional pathway that is potentially interacting with the human  
1025 immune system early on is resistance to cationic antimicrobial peptides (CAMP).  
1026 While resistance to antimicrobial peptides has been found in all major commensal

1027 phyla of the human gut and across all members of the phylum Bacteroidetes, this  
1028 pathway is essential to evade detection by the human immune system through the  
1029 modification of the microbial LPS structure<sup>55</sup>. In the context of our study, an  
1030 enrichment in CAMP resistance may prevent the predominantly colonizing gut  
1031 bacteria (i.e. Bacteroidetes) from being recognized by the immune system and  
1032 subsequently removed from the VD neonatal gut. Future studies are needed to assess  
1033 whether the gut microbiome of VD neonates harbours more modified LPS moieties  
1034 linked to CAMP resistance and what the subsequent immunostimulatory effects of  
1035 altered LPS structures may be on the neonatal immune system. In accordance with the  
1036 observation of an apparent enrichment in flagellar biosynthesis, bacterial chemotaxis,  
1037 CAMP resistance, other microbiota-derived molecular factors, apart from LPS, may  
1038 be involved in immune system priming.

1039

1040 The FDR cut-off was set to 0.05. We have additionally included the statistics per KO  
1041 in the supplementary data of the revised manuscript ([Supplementary Data 10](#)).

1042

1043 **2.14.** GAG and other glycan metabolism is mentioned in the abstract but is only  
1044 addressed in the supplement. If this is an important point, it should be included in the  
1045 main manuscript. If not in the main manuscript, it should be left out of the abstract.

1046

1047 **Response:**

1048 We appreciate the reviewer's observation and agree that the section on GAG and  
1049 other glycans was referred to in the abstract but not discussed in the main text due to  
1050 the space limitations for the original format (*Nature* Letter format). Following the  
1051 analysis of additional metagenomic sequencing data, we now find additional  
1052 microbial pathways that are enriched in VD neonates compared to CSD and that could  
1053 also be highly relevant for the neonatal host organism. We have revised the abstract as  
1054 well as reported and discussed these pathways in the revised manuscript. For more  
1055 information, please also refer to the reply to **comment 2.13.** above.

1056

1057 **2.15.** When cytokine levels were obtained from 31 neonates, it seems inappropriate to  
1058 label the 14 additional infants as an "independent validation cohort" if the results are  
1059 aggregated with the discovery cohort. This is misleading to me.

1060

1061 **Response:**

1062 We agree with the reviewer and have changed this accordingly in the revised  
1063 manuscript.

1064

1065 **2.16.** The reference citation format appears to change at line 404. This is a small  
1066 typographical issue.

1067

1068

1069



1070 **Response:**

1071 To avoid any confusion when adding a reference number to a number in the text (as  
1072 for software version numbers), we decided to use the chosen style. However, in order  
1073 to stick to a uniform reference style, we have changed the citation style throughout the  
1074 revised manuscript.

1075

1076 **Reviewer #3**

1077 **Overall summary**

1078 **3.1.** In this interesting research paper by Wampach et al, authors used a very robust  
1079 bioinformatics approach to track specific bacterial strains from mothers to neonates  
1080 during the perinatal period, taking into account levels of genetic diversity using well-  
1081 established molecular ecology methods. This study has numerous strengths that are  
1082 original and should be published: it combined taxonomic and functional profiling of  
1083 the microbiome using reference independent metagenomics analysis, included  
1084 controls and a bioinformatic approach that accounted for reagent and host derived  
1085 contaminant DNA and removal of sequencing artefacts, and utilized sequencing data  
1086 to inform the experimental parameters of an immune assay, which was informative of  
1087 the potential interactions between LPS and the immune system. However, these  
1088 strengths are not the main claim of this study. This clinical study was not designed nor  
1089 was it shown to be powered to determine perinatal microbiome differences driven by  
1090 mode of birth, and its results should not be interpreted as such. Below is a list of  
1091 major and minor suggestions that should be incorporated in a new version of this  
1092 manuscript.

1093

1094 **Response:**

1095 We appreciate the reviewer's assessment of the quality and importance of the work.  
1096 As discussed above and in the following comment (see responses to **comments 1.2.**  
1097 **and 3.2.**), we have included results from additional samples from additional  
1098 individuals in the revised version of the manuscript. The results from the additional  
1099 analyses support the conclusions in the original manuscript.

1100

1101 **Major comments**

1102 **3.2.** The sample number in this study is simply too low and there were no power  
1103 calculations performed a priori to determine if it could identify difference between  
1104 birth modes. Given that other small studies have failed to show microbiome  
1105 differences driven by birth mode, it is hard to believe that this study was powered to  
1106 assess the influence of birth mode, let alone the influence of low birth weight. I  
1107 recommend that authors present power calculations based on previously published  
1108 data to determine this. A good resource to perform these calculations for studies with  
1109 multivariate data is MetSizeR. Clearly, the results from this study are in line with  
1110 most other studies that have convincingly shown that mode of birth drives temporal  
1111 neonatal composition and diversity. However, a recent study from the Xavier group  
1112 (DOI: 10.1126/scitranslmed.aad0917) showed that while most CS births were

1113 associated with lower *Bacteroides* species abundance, about 20% of the VD babies  
1114 displayed a similar pattern. With an N=4 per group (including 1 set of twins in the  
1115 CSD groups) with only 2 valid time points (Day 1 only had 2 samples in 2 of the  
1116 groups, so in my opinion should be excluded for comparisons), there is simply no  
1117 statistical power to detect appropriate variance of a given population, especially  
1118 considering the interindividual variability of the gut microbiome during the first days  
1119 of human life.

1120  
1121 **Response:**

1122 We agree with the reviewer that the number of study participants is comparatively  
1123 low in relation to previous studies (see response to **comment 1.2.**). Nevertheless, it is  
1124 important to emphasize important unique aspects of our study: (i) paired mother-  
1125 infant samples, (ii) samples from the earliest time points, and (iii) high-resolution,  
1126 contaminant-free metagenomic data. We want to stress again that the main point of  
1127 the manuscript is not statistics-driven, as the presence of strains, given their high  
1128 degree of specificity, is valid only on an individual, sample-to-sample basis. Single  
1129 nucleotide variants are highly specific and the presence of the exact same gut strains  
1130 in mothers and their vaginally delivered neonates demonstrates that transfer of strains  
1131 happens from mothers to neonates, with vaginal delivery being the most probable  
1132 mode of vertical transfer. The fact that considerably less maternal enteric strains were  
1133 found in neonates that were delivered by C-section, provides evidence that delivery  
1134 through C-section impedes this vertical transfer. Our high-resolution approach of  
1135 strain tracking in addition to statistical tests on the functional profiles (which are  
1136 statistically significant; see also our response to **comment 3.3.** below) is more robust  
1137 and to date unprecedented with regards to the earliest neonatal gut microbiome.  
1138 Nevertheless, we have included additional metagenomic sequencing data, as well as  
1139 16S rRNA gene sequencing data from additional neonates, which support our high-  
1140 resolution, strain-specific tracking results. Please also refer to **comment 1.2.** for  
1141 additional details.

1142  
1143 With specific regards to the study from the Xavier group, we want to stress that their  
1144 conclusions on the low relative abundance levels of *Bacteroides* were (i) based on a  
1145 disproportionate distribution of study participants regarding delivery mode (4 C-  
1146 section delivered against 35 vaginally delivered infants), which compromises their  
1147 statistical power, (ii) were based on 16S rRNA gene amplicon sequencing, (iii) did  
1148 not include paired mother-neonate pairs, and (iv) did not focus on earliest time points  
1149 after birth. In our case, as the tracking of highly specific strains from mother to  
1150 neonate is considered on a case-by-case basis, our main conclusions are valid in light  
1151 of inter-individual variability of the gut microbiome during the first days of human  
1152 life.

1153  
1154 **3.3.** Although differences between groups were detected using appropriate statistical  
1155 tests, without confidence intervals and proper statistical tests to deconfound the effect

1156 of birth mode from other variables known to influence microbiome composition, it is  
1157 not possible to properly assess whether birth mode truly drives these differences.  
1158 Given that authors have access to 20 more samples (6 for which they had 16S data  
1159 and 14 from a previous cohort that was collected in a similar way), the authors could  
1160 use the 16S data and PICRUSt, at a minimum, to determine if other variables are also  
1161 influencing the associations found between birth mode and microbiome composition.  
1162 An excellent tool for this purpose is MsAsLin  
1163 (<https://huttenhower.sph.harvard.edu/maaslin>). Variables to include in this model are  
1164 gestational age, antibiotic use, dose, duration, time of meconium passage, if babies  
1165 ingested colostrum, etc. In addition, authors should demonstrate that the samples used  
1166 for metagenomics analysis are representative of the larger group of samples. For this,  
1167 they could compare microbiome characteristics (beta or alpha diversity) as well as  
1168 clinical variables (mode of birth, gestational age, etc.)

1169  
1170 **Response:**

1171 We thank the reviewer for this constructive comment. In accordance with the  
1172 reviewer's suggestion, we have included additional 16S rRNA gene amplicon  
1173 sequencing data in the revised manuscript (see also our response to **comment 1.2.**).  
1174 Furthermore, in accordance with the reviewer's suggestion to determine whether other  
1175 variables are potentially influencing the associations found between delivery mode  
1176 and microbiome composition, we have indeed used the tool MaAsLin by including  
1177 variables such as delivery mode, feeding regime, gestational age and maternal  
1178 antibiotics intake. The major trends that were highlighted in the initial manuscript  
1179 were thereby still explained by delivery mode [i.e. higher relative abundance of  
1180 *Staphylococcus* or lower levels in *Bacteroides* in CSD ( $\pm$  SGA) neonates]. Please also  
1181 refer to our reply to **comment 2.1.**

1182  
1183 In accordance with the reviewer's suggestion to infer functional profiles based on the  
1184 extensive 16S rRNA gene amplicon data, we also used the tool PanFP  
1185 (<https://github.com/srjun/PanFP>) and observed similar trends to the pathways that we  
1186 detected based on metagenomic sequencing. In order to predict the functional profiles  
1187 of microbial communities based on our 16S rRNA gene amplicon data, we have  
1188 included additional analyses in the revised manuscript that are based on the tool  
1189 PanFP (doi:10.1186/s13104-015-1462-8). While PICRUSt presumes a closed-  
1190 reference OTU picking strategy, which results in a strong dependency on the  
1191 completeness of the reference database, PanFP is highly compatible with the open-  
1192 reference strategy of NG-Tax (doi:10.12688/f1000research.9227.1) that we used for  
1193 processing the 16S rRNA gene amplicon data. An additional paragraph on the  
1194 outcome of these analyses has been included in the revised manuscript.

1195  
1196 Results, manuscript lines 258 to 276: Additionally, the relative abundances of 7,000  
1197 KO functional categories were predicted using PanFP<sup>37</sup> based on the extensive 16S  
1198 rRNA gene amplicon data (Supplementary Data 11). A multivariate analysis  
1199 (MaAsLin<sup>35</sup>) was performed to compare the functional profiles of CSD ( $\pm$ SGA) to

1200 VD neonates and for both generated datasets (i.e. predicted KO functional categories  
1201 based on 16S rRNA gene amplicon sequencing data and annotated KOs based on  
1202 metagenomic sequencing data). Results from the multivariate analyses demonstrated  
1203 that delivery mode was the strongest determining factor in both datasets (i.e. predicted  
1204 and metagenomic-based KOs) for explaining the differentially abundant genes  
1205 (Supplementary Data 9). Whilst not statistically significant, the trends for the  
1206 predicted microbial pathways obtained with PanFP were largely concordant with the  
1207 enriched pathways in VD neonates based on the differential analysis of the  
1208 metagenomic data. Nevertheless, predictions of functional potentials based on 16S  
1209 rRNA gene amplicon sequencing data are likely unreliable as a significant fraction of  
1210 the gut microbiome (i.e. up to 40%) is represented by microorganisms without a  
1211 sequenced isolate genome<sup>38</sup>. In contrast, the metagenomic data, through resolving the  
1212 actual functional gene complement, allows a detailed comparison of the functional  
1213 potential of the earliest gut microbiomes, as well as the tracking of individual-specific  
1214 single-nucleotide variants (SNVs).

1215

1216 In order to assess whether the samples used for metagenomic analysis were  
1217 representative of the larger group of samples in the initial manuscript, we included a  
1218 supplementary note and supplementary figures on specific microbiome  
1219 characteristics, including beta and alpha diversity, in the original manuscript.  
1220 According to this information, the presented metagenomic data is representative of the  
1221 larger group of samples.

1222

1223 Results, manuscript lines 186 to 194: The 16S rRNA gene amplicon and the  
1224 metagenomic sequencing data, which was generated for a subset of mother-neonate  
1225 pairs, showed highly similar succession trends in terms of diversity, evenness and  
1226 richness measures (Supplementary Fig. 2a&b; Supplementary Note 2). The taxonomic  
1227 profiles derived from the 16S rRNA gene amplicon and metagenomic sequencing  
1228 were highly correlated (Supplementary Fig. 3a). The differences in taxonomic profiles  
1229 according to delivery mode reflected results from previous studies, notably the higher  
1230 relative abundance in *Bacteroides* and *Parabacteroides* and lower levels in  
1231 *Staphylococcus* in VD neonates at days 3 and 5 postpartum<sup>7,10</sup> (Supplementary Data 6  
1232 to 8; Supplementary Note 3).

1233

1234 Supplementary Information, Supplementary Note 3: To identify differences between  
1235 the birth modes (and SGA status) and the different collection time points postpartum,  
1236 we performed Wilcoxon rank-sum tests (without multiple-alignment adjustments) on  
1237 the sum-normalized relative abundances of metagenomic and 16S rRNA gene  
1238 amplicon sequencing data (Supplementary Data 7 and 8). Although several  
1239 statistically significant differences were found, we only considered genera and OTUs  
1240 that showed the same trends for both CSD and CSD+SGA neonates and had a P-  
1241 value below 0.05. In VD neonates, compared to both CSD and CSD+SGA, the  
1242 metagenomic data resolved a higher relative abundance of the species *Bacteroides*  
1243 *dorei/vulgatus* (day 5 VD vs CSD,  $P = 2.5 \times 10^{-2}$  and VD vs CSD+SGA,  $P = 1.2 \times$

1244  $10^{-2}$ ), as well as the specific *Bacteroides dorei/vulgatus* mOTU (day 5 VD vs CSD,  $P$   
1245  $= 1.4 \times 10^{-2}$  and VD vs CSD+SGA,  $P = 6.7 \times 10^{-3}$ ). Based on the 16S rRNA gene  
1246 amplicon sequencing data, significantly higher relative abundances of the genus  
1247 *Bacteroides* were observed in VD neonates at days 3 and 5 (day 3,  $P = 7.8 \times 10^{-3}$  and  
1248  $P = 1.2 \times 10^{-2}$ ; day 5,  $P = 1.2 \times 10^{-3}$  and  $P = 5.1 \times 10^{-3}$ , respectively). The genus  
1249 *Parabacteroides* was significantly increased ( $P = 4.2 \times 10^{-3}$  and  $P = 2.8 \times 10^{-2}$ ),  
1250 while *Rothia* was found to be significantly decreased in VD neonates ( $P = 1.8 \times 10^{-2}$   
1251 and  $P = 2.2 \times 10^{-4}$ ). A total of 10 OTUs assigned to the genus *Staphylococcus* were  
1252 significantly increased in CSD±SGA neonates, while OTU 243 assigned to  
1253 *Bacteroides* was significantly increased in VD neonates at days 3 and 5 (day 3,  $P =$   
1254  $2.3 \times 10^{-2}$  and  $P = 2.5 \times 10^{-2}$ ; day 5,  $P = 2.5 \times 10^{-3}$  and  $P = 9.4 \times 10^{-3}$ , respectively).  
1255

1256 **3.4.** The results from the immune assay with extracted LPS from different neonatal  
1257 samples are quite compelling but remain rather preliminary, and could be enhanced in  
1258 several ways. As it stands, the purity of the LPS was not assessed, it is vaguely  
1259 assumed that the majority of the cytokine response measured originated from *E. coli*  
1260 LPS, and although it is mentioned in the text, it is not known if the differences in  
1261 cytokine response are due to differences in LPS structure. Addressing at least 2 of  
1262 these issues will significantly strengthen this paper. LPS purity can be determined by  
1263 gel electrophoresis (comparing silver, protein and DNA staining, for example), or if  
1264 available, mass spectrometry analysis. Differences in LPS structure (rough vs smooth,  
1265 for example) can also be obtained through these methods. LPS purity can also be  
1266 confirmed functionally by showing that the purified products did not activate Toll-like  
1267 receptor 2 (TLR2), nuclear oligomerization domain 1 (NOD1), or NOD2 but did  
1268 activate TLR4.  
1269 Importantly, if the authors have more samples from other cohorts available, why not  
1270 increase the number of samples from this assay?  
1271 As for determining the origin of the LPS, could LPS genes not be assigned to the  
1272 mOTUs given that the information is available? This is important as it will inform  
1273 which taxa may or may not be relevant in stimulating immune cells during the first  
1274 days of life.

1275

1276 **Response:**

1277 We appreciate the reviewer's recognition of the compelling nature of the  
1278 immunological data presented and thank him/her for the suggested additional  
1279 experiments to strengthen the study. To address the reviewer's comments, we have  
1280 now conducted additional experiments including additional LPS extractions from  
1281 additional samples from early neonates. More specifically, in the revised manuscript  
1282 we have included results reflecting the purity of the isolated LPS and on the  
1283 specificity of immunological responses. Please also refer to our detailed response to  
1284 **comment 2.9.** above. Bearing in mind these additional experiments, we have  
1285 addressed both suggestions of the reviewer regarding assessment of LPS purity and  
1286 immunogenicity. The results of these additional analyses underscore our earlier

1287 results and thereby further strengthen our original conclusions.

1288

1289 For determining the origin of LPS, we annotated the OTUs resulting from the 16S  
1290 rRNA gene sequencing data according to their Gram staining characteristics using the  
1291 recorded microbial attributes from NCBI ([http://www-ab2.informatik.uni-  
1292 tuebingen.de/megan/taxonomy/microbialattributes.zip](http://www-ab2.informatik.uni-tuebingen.de/megan/taxonomy/microbialattributes.zip)). More precisely, the Gram  
1293 staining information of microorganisms directly corresponds to their propensity of  
1294 producing LPS, therefore the direct assignment of OTUs being either Gram positive  
1295 or negative is robust, while identifying LPS gene functions in the complement of  
1296 reconstructed genomes provides comprehensive results only for the most dominant  
1297 taxa, i.e. those with almost complete genome reconstructions. On a genome-scale  
1298 level, we identified which taxa may be relevant in stimulating immune cells during  
1299 the first days of life in the initial manuscript and this information was represented by  
1300 the colored spokes in the Circos plots in Figure 3. Based on these observations, we  
1301 suggested that strains that were transferred from mother to VD but not CSD neonate  
1302 were significantly enriched in genes that are involved in LPS biosynthesis. To clarify  
1303 these points, we have included additional text passages in the revised manuscript.  
1304 Please refer to the cited text passages given under **comment 1.2.** and **2.6.**

1305

1306 **3.5.** Extended data figure 2. Change color palette. Too many tones of blues and  
1307 greens. Don't do color coordination according to phyla.

1308

1309 **Response:**

1310 We thank the reviewer for this constructive comment. We have tried several color  
1311 combinations for this supplementary figure but concluded that the current color  
1312 palette based on phyla assignment was the most informative for the visual assessment  
1313 of the neonatal gut microbiome composition. For a more detailed evaluation, the  
1314 complete mOTU table obtained by metagenomic sequencing is provided in the  
1315 supplementary data ([Supplementary Data 3](#)).

1316

1317 **Minor comments**

1318 We thank the reviewer for their valuable input. We comprehensively addressed all the  
1319 reviewer's minor comments in the revised version of the manuscript.

1320

1321 **3.6.** Blinding in Life Sciences reporting summary: "As assigned study groups were  
1322 predefined prior to delivery, blinding was irrelevant to our study." This is false. Many  
1323 studies with predefined study groups are blinded and this adds strength to the study  
1324 design. This study was simply non-blinded, please change.

1325

1326 **Response:**

1327 We thank the reviewer and agree with this comment. We have made a corresponding  
1328 change to the reporting summary.

1329

1330 **3.7. FIGURE 2:** It is unclear how the DESEQ2 generated results are displayed in  
1331 Figure 2. Deseq2 compares 2 groups. According to Figure 2a it looks that the  
1332 comparison was made between VD samples and all CSD samples combined but figure  
1333 legend and methods section describes two separate comparisons. Were the same 5  
1334 pathways differential in both comparisons or only when VD samples were compared  
1335 to all CS babies?

1336  
1337 **Response:**

1338 We thank the reviewer for this relevant comment. Indeed, as DESeq2 compares two  
1339 groups, we made comparisons based on VD vs CSD and VD vs CSD+SGA.  
1340 Subsequently, we combined all significantly differential KOs from both tests for  
1341 which the FDR-adjusted  $P$  value of the Wald test was  $<0.05$  for at least one  
1342 comparison and for which the directionality of change in both comparisons was the  
1343 same. We have made corresponding changes to the revised manuscript.

1344  
1345 Material and methods, manuscript lines 836 to 844: Differential analysis of KO  
1346 abundance, comparing VD to CSD and VD to CSD+SGA with a linear model, which  
1347 considered the different collection time points containing at least 1,000 KOs (days 3  
1348 and 5) as covariates, was performed with the R package ‘DESeq2’ version 1.10.1<sup>36</sup>.  
1349 KOs were considered significantly differentially abundant in VD and CSD ( $\pm$  SGA) if  
1350 the FDR-adjusted  $P$  value of the Wald test was  $<0.05$  for at least one comparison  
1351 (CSD versus VD or CSD+SGA versus VD) and the directionality of change in both  
1352 comparisons was the same. Differentially abundant pathways were detected through  
1353 pathway enrichment analysis using a custom R script<sup>59</sup>.

1354  
1355 Results, manuscript lines 226 to 232: We detected a total of 1,697 functional  
1356 categories from the Kyoto Encyclopedia of Genes and Genomes (KEGG) Orthology  
1357 (KO) database that were differentially abundant in the combined comparisons of the  
1358 gut microbiome of CSD and CSD+SGA neonates to VD neonates and were  
1359 presenting the same directionality of log fold change. We used the R package  
1360 ‘DESeq2’<sup>36</sup> with a linear model, which considered the different collection time points  
1361 containing at least 1,000 KOs (days 3 and 5) as covariates (Fig. 2a; Supplementary  
1362 Data 10).

1363  
1364 Figure legend, manuscript lines 1320 to 1332: Heatmap of relative abundance of gut  
1365 microbial orthologous gene groups with significant differential abundances in  
1366 neonates born by vaginal delivery (VD) compared to either caesarean-section delivery  
1367 (CSD) or CSD with small for gestational age (SGA) status (CSD+SGA) groups and  
1368 having the same direction of log<sub>2</sub> fold change (calculated with the R package  
1369 ‘DESeq2’<sup>36</sup> and indicated by the color key; false-discovery-rate (FDR)-adjusted  $P$   
1370  $<0.05$ ).

1371  
1372 **3.8. FIGURE 4:** The figure legend does not fully explain 4a. Specifically, it was only

1373 after I read the main text that I understood that the EU amounts were measured in the  
1374 immune assay. I was confused and initially thought it was the LPS concentration used  
1375 in the assay.

1376

1377 **Response:**

1378 We thank the reviewer for pointing this out. In fact, the endotoxin units (EU) given in  
1379 Figure 4a (now **Supplementary Fig. 13** in the revised manuscript) were estimated  
1380 based on the quantification of the LPS samples prior to the immunostimulatory assay.  
1381 No LPS amounts were measured in the immune assay. We have revised the  
1382 manuscript and figure legends to make this clearer.

1383

1384 Figure legend, manuscript lines 1367 to 1380: Lipopolysaccharide (LPS) was isolated  
1385 from faecal samples collected on day 3 postpartum from neonates in groups of vaginal  
1386 delivery (VD), caesarean-section delivery (CSD) and CSD with small for gestational  
1387 age (SGA) status (CSD+SGA), and incubated for 24 h with human monocyte-derived  
1388 dendritic cells (MoDCs) isolated from a total of 12 adult donors. MoDCs were  
1389 stimulated the with the exact same LPS volume that was extractable from the same  
1390 initial amount of faecal material from each neonate sample (Methods).

1391

1392 **3.9.** Line 87, vaginal or stool in mothers?

1393

1394 **Response:**

1395 We thank the reviewer for pointing this out. We clarified this part in the revised  
1396 manuscript.

1397

1398 Results, manuscript lines 206 to 219: To assess whether the apparent taxonomic  
1399 differences between the gut microbiomes of VD and CSD neonates are reflected at the  
1400 level of functional potential, we used the metagenomic sequencing data to compare  
1401 functional profiles of all neonates to the gut microbial potential of their respective  
1402 mothers. We also compared the CSD ( $\pm$ SGA) microbiota at day 3 and day 5  
1403 postpartum to those of VD neonates. The correlations of the functional profiles of the  
1404 neonatal gut microbiome to the respective maternal vaginal microbiome were lower  
1405 (median rho 0.06 for day 1, 0.37 for day 3 and 0.44 for day 5) than the correlation  
1406 between neonatal and maternal gut microbiomes (median rho 0.29 for day 1, 0.59 for  
1407 day 3 and 0.62 for day 5). While the correlations of the functional profiles of the  
1408 neonatal gut microbiome and the maternal vaginal microbiome did not differ  
1409 significantly between delivery modes, early microbial functions in VD neonates better  
1410 reflected the mothers' functional gut microbiome profiles compared to CSD ( $\pm$  SGA)  
1411 neonates (Fig. 2a; Wilcoxon rank-sum test, FDR-adjusted  $P = 4.1 \times 10^{-3}$  for day 3).

1412

1413 **3.10.** Line 94-96 briefly mention what statistical method was used (if any) to rule out  
1414 the influence of feeding method

1415



1416 **Response:**  
1417 We thank the reviewer for this comment. In the revised manuscript, we have included  
1418 a detailed multivariate analysis using MaAsLin. For more details, please refer to our  
1419 reply to **comments 2.1.** and **2.2.**  
1420

1421 **3.11.** Lines 99-105 Where there any comparisons done between VD samples and each  
1422 of the CSD groups. If so, this should be mentioned in this section. If not why separate  
1423 the CSD groups?

1424  
1425 **Response:**  
1426 We thank the reviewer for this comment. Indeed, comparisons between VD and CSD  
1427 and VD and CSD+SGA were done and were largely matching independent of the  
1428 SGA status. As no discernible differences were observed based on Fig. 4a between  
1429 CSD and CSD+SGA, we chose to combine both groups in order to increase the  
1430 statistical power.

1431  
1432 [Results, manuscript lines 237 to 240:](#) In order to increase the statistical power and as  
1433 comparisons between VD and CSD and VD and CSD+SGA were largely matching  
1434 independent of additional SGA status, we combined both groups (CSD and  
1435 CSD+SGA; Fig. 2b and c).

1436  
1437 **3.12.** Line 144, sources of microbial origin are too speculative, I suggest removing

1438  
1439 **Response:**  
1440 We thank the reviewer for the suggestion. We have revised the manuscript and cited  
1441 previous studies that observed or suggested strain transfer from other environments to  
1442 the neonate.

1443  
1444 [Discussion, manuscript lines 485 to 487:](#) Consequently, the gut of CSD neonates is  
1445 most likely colonized by strains derived from other sources, such as breast milk, skin  
1446 or saliva, as suggested in previous studies<sup>44-46</sup>.

1447  
1448 **3.13.** Line 174 I suggest changing “more specifically” for “especially”

1449  
1450 **Response:**  
1451 We thank the reviewer for the suggestion and we have revised the manuscript  
1452 accordingly.

1453  
1454 [Results, manuscript lines 401 to 404:](#) The levels of all measured cytokines, and  
1455 especially of TNF- $\alpha$  and IL-18, were higher in culture supernatants from MoDCs  
1456 treated with LPS from VD neonates (Supplementary Figure 13; Supplementary Data  
1457 16; Supplementary Note 6).

1458

1459 **3.14.** Line 202-203 Huge stretch here. There is no data on chronic diseases in this  
1460 super small cohort. Also omit from the summary figure in extended data.

1461

1462 **Response:**

1463 We thank the reviewer for pointing this out. We agree that the previous statement was  
1464 too suggestive in the given context. We have now included a separate paragraph based  
1465 on previous studies, which support our results. We have also removed the summary  
1466 figure.

1467

1468 Discussion, manuscript lines 522 to 542: Our study highlights differences in  
1469 immunostimulatory potential of the earliest gut microbiome according to delivery  
1470 mode. This occurs during a critical window of immune system priming. Notably,  
1471 alterations to early immune system stimulation may be linked to the higher propensity  
1472 of CSD infants to develop chronic diseases in later life<sup>2</sup>. For example, previous  
1473 studies focusing on environmental exposure in early life have suggested that the  
1474 exposure to Gram-negative bacteria and/or environmental endotoxins (such as LPS)  
1475 could confer protective effects towards allergy development<sup>48,49</sup>. In this context, the  
1476 LPS biosynthesis pathway harbours the potential to be closely involved in the priming  
1477 of the neonatal immune system and the subsequent tolerance towards the colonizing  
1478 gut microbiome during a most critical window in early neonatal life<sup>12-14</sup>, with  
1479 potential persisting effects on the later health status. Using a mouse model, it has been  
1480 shown that strongly immunostimulatory LPS can contribute to the protection from  
1481 immune-mediated diseases such as diabetes<sup>50</sup> and that disruption of host-commensal  
1482 interactions in early-life can lead to persistent defects in the development of specific  
1483 immune subsets<sup>12</sup>. Based on additional cytokine measurements in neonatal plasma,  
1484 VD neonates displayed higher levels of IL-18 and TNF- $\alpha$ , thereby indicating a link  
1485 between the immunostimulatory potential of microbial LPS in the gut and the overall  
1486 immune status of the neonatal host early on. Investigations of the longer-term  
1487 consequences of these differences between CSD and VD neonates will be necessary  
1488 to assess their possible impact on the development of chronic diseases in later life.

1489

1490 **3.6** Lines 483-487 Unclear why bacterial DNA amount needed to be controlled in the  
1491 LPS assay. Please elaborate either here on in the Supplementary notes. These assays  
1492 conditions will not mick the amount of LPS that interacts with a peripheric immune  
1493 cells so I do not understand the reasoning behind this. Why not normalize by LPS  
1494 units only? DNA quantification via qPCR of 18S RNA gene will vary depending on  
1495 the number of 16S copies per cell so it is not the best way to quantify bacterial load.  
1496 Further, this method will account for all bacterial cells, not just gram-negative (LPS  
1497 containing cells). Flawed method.

1498

1499 **Response:**

1500 The rationale for using the amount of bacterial DNA was to compare the same  
1501 bacterial load for each sample and, thus, assess if a distinct sample will induce a

1502 distinct immune response. As the bacterial loads in early meconium samples were in  
1503 general lower in CSD compared to VD, we thereby aimed to minimize the likelihood  
1504 that an observed effect is not due to a lower bacterial presence in the CSD meconium.  
1505 However, we also agree with the reviewer that the current normalization does not  
1506 reflect the real situation. Therefore, we have included additional immunological  
1507 assays in the revised manuscript in which we stimulate primary immune cells with the  
1508 exact same “LPS volume” extracted from the exact same starting faecal mass for each  
1509 individual sample. Using both methods, we observed the same effects (Fig. 4a and  
1510 Supplementary Fig. 13). With respect to additional samples that were used, as well as  
1511 the specific reporter cell lines (comments 2.6., 2.9. and 3.4.), we thus show that the  
1512 immunological stimulatory potential of neonatal faecal samples is much higher in  
1513 case of vaginal delivery compared to C-section delivery.

1514

1515 Results, manuscript lines 392 to 401: In order to reflect the *in vivo* situation as closely  
1516 as possible, we stimulated the MoDCs with the exact same LPS volume that was  
1517 obtainable from the same initial amount of faecal material from each neonate sample  
1518 and subsequently measured levels of the LPS-inducible cytokine TNF- $\alpha$  in the  
1519 supernatants using an ELISA assay (Fig. 4a; Supplementary Data 13). In parallel, a  
1520 panel of additional cytokines was measured using an approach for quantifying and  
1521 normalizing the employed LPS fractions (Methods). This was based on a maximum  
1522 stimulation of MoDCs with 100 Endotoxin Units (EU) of LPS in order to mimic the  
1523 amount of LPS an immune cell may encounter within a given neonatal sample  
1524 (Supplementary Figure 13; Supplementary Data 14 and 15).

1525

1526 11. Line 124 of Supplementary notes: I would change “corresponded” to correlated

1527

1528 **Response:**

1529 We agree with the reviewer and have adapted the manuscript accordingly.

1530

1531 Supplementary Information, supplementary note 6: The observed levels of TNF- $\alpha$   
1532 mostly correlated with the relative abundance of Gram-negative bacteria (Fig. 4a,  
1533 Supplementary Fig.3b).

1534

1535 12. The manuscript could use a brief discussion on the choice of adult blood DCs and  
1536 how it may have differed from neonate peripheral immune cells. Neonatal immune  
1537 cells are known produce immune responses similar to adults in some aspects but not  
1538 others.

1539

1540 **Response:**

1541 We thank the reviewer for this constructive comment. We included details on the  
1542 choice of adult blood DCs to the revised manuscript.

1543

1544 Material and methods, manuscript lines 879 to 885: Human neonatal dendritic cells  
1545 (DCs) were previously shown to be competent in MHC class I antigen processing and  
1546 presentation to the same extent than adult DCs<sup>79</sup>. Most importantly, the NF- $\kappa$ B-  
1547 dependent pathway in TLR-4 signalling is intact in neonatal MoDCs as they produce  
1548 pro-inflammatory cytokines upon LPS stimulation, while adult and neonatal DCs are  
1549 both able to produce comparable levels of TNF- $\alpha$ , IL-6 and IL-8 in response to LPS<sup>80</sup>.

## REVIEWERS' COMMENTS:

### Reviewer #1 (Remarks to the Author):

The authors performed a substantial amount of work and additional experiments for this revised manuscript. The new data is strong and all the crucial issues pointed out on the original submission seem to be fixed. One of the strongest points of the work is the increased vertical transmission of microbes in vaginally delivered infants compared to delivery via C-section.

I still have some remarks for the authors.

1 - The paper is convincing on the fact that vaginal deliver impacts the infant microbiome. The authors state that this was quite controversial, but I partially disagree with this. What was controversial is whether the effect on the microbiome of vaginal versus C-section delivery is long-lasting and whether it is stronger than other conditions including breast-feeding versus formula-feeding. Because in this study the infants are not followed for months and breast feeding is not discussed in depth, these questions cannot be answered. I think the authors should be a bit more careful when discussing the effect of delivery mode on the microbiome, because there are not really many controls for other conditions (again feeding regime).

2 - The introduction now is very comprehensive. However, it is also redundant and repeated in several passages. I feel the introduction should be shortened a bit and repeated concepts minimized. Also the discussion is very verbose.

3 - Is multiple hypothesis testing correction applied on the identification of 1,697 differential KEGG KOs at line 226?

4 - Figure 3A. It is difficult to see the vertical transmission events because of the use of a color gradient (shade of orange). More distinct colors should be adopted here, and in general the figure is not very intuitive. In the legend, it is not clear what "taxon without link" means

5 - line 212-220: microbiomes from different body sites of the mother and infants are here compared using correlation. Giving the large differences in the overall structure of the microbiome across body sites and hosts, I don't think correlation is the correct statistical tool to use.

### Reviewer #2 (Remarks to the Author):

In this manuscript, Wampach et al collected stool samples from mothers and matched neonates. They perform shotgun sequencing and analyze the gene-level differences between the stool microbiomes of vaginally born babies vs. C-section born babies. They find that genes encoding LPS synthesis are enriched in the vaginally born babies - and that the LPS extracted from these two stool types, when tested on primary human immune cells, elicits differences in cytokine release. The LPS extracted from the Vaginally born babies appears to be more immunostimulatory. Thus, the authors conclude that C-section disrupts transfer of specific microbial strains that are highly immunostimulatory, and that this may impact "neonatal immune system priming".

Overall, the manuscript is much improved from its prior version. A notable strength of

this manuscript is the collection and evaluation of very early post-natal samples (day 0-5) and the strong effort to characterize the functional impact of LPS on the immune system. The manuscript, as it stands, is a bit lengthy (especially in the discussion section), but is well carried out and interesting. I offer the following suggestions for improvement.

**Major suggestions:**

#. The authors now allude to the existing controversy in evaluating the impact of birth-mode on microbial "transmission". I propose that it might be better for the authors to steer clear of the transmission question and to simply report the results in the context of vaginally born and CS born babies having different microbiomes (which may be the consequence of confounding factors other than just birth mode - e.g. antibiotic exposure).

#. The title suggests that birth mode is causal of strain-conferred gut microbiome functions and immunostimulatory potential - I think the title should be adjusted to reflect the fact that the authors identify an association, as opposed to a causal link between birth mode and these outcomes.

#. Are there any other notable differences between the VD and CSD babies? Or were these all elective CSD babies - which would be the best comparator.

#. I find the LPS aspect of the paper the most novel and exciting - but it is only briefly focused on in the manuscript. Also, is there a reason that only a subset of the total number of subjects was included in the LPS part of the study? Lastly, is there a reason the day 3 sample was selected (as opposed to the day 5 sample, which may have been higher biomass)?

**Minor suggestions:**

#. Would remove the phrase "After data curation" in the abstract - it is vague.

#. line 76 - I am not exactly sure what the authors are referring to when they state "Although CSD is not associated with improved health outcomes...". Also - are the a

#. Line 86 - would call this 16S rRNA gene amplicon sequencing.

#. Line 132 - for what proportion of samples could sufficient DNA be extracted for downstream metagenomic analysis?

#. The majority of the analyses seem to focus on CSD +/- SGA compared to VD; I applaud the authors for including CSD -SGA controls - but am surprised that they chose not to analyze the three groups (CSD -SGA, CSD + SGA and VD) separately, as this would be a much stronger analysis that lacked the likely confounding factors contributed by SGA.

#. Line 422, 458 - calling the approach they employed "artefact-free" seems hyperbolic.

#. line 490 - typo - "form" instead of "from"

#. Only 16 mother/neonate pairs were collected; yet, additional neonates were studied - the methods section could be more clear as to how those additional neonates were recruited to the study.

#. I presume the authors used standard V4 primers for 16S sequencing. Please state this, if so.

#. What is the "optimized low-quantity DNA library preparation kit" that was used?

#. Why were some of the metagenomic libraries (C105, 109, 110 and 119) prepared using another (presumably) kit?

#. The method for removing artifactual reads relies on contig assembly and alignment. What was the contig size cutoff used for this method? If the contig size cutoff is >read length, this might remove low abundance contaminants that are not present at a high enough abundance to assemble into contigs - thus compromising the effectiveness of this contamination removal effort.

#. line 854 - Please provide some additional detail in text regarding the "further purification" that was used to obtain the LPS.

#. Line 856 - why was LPS from the three aliquots of stool pooled - presumably because each extraction resulted in a very small amount of LPS. I would have very much liked to see this assay done in replicate (starting with the stool), as I am not familiar with the variability of LPS extraction efficiency.

#. What proportion of all metagenomic reads were assigned a potential function? I ask because it seems surprising that 2% of all metagenomic reads are classified as part of a 2-component system, for example. That seems rather high.

#. Figure 3 is very complex and does not communicate a strong, focused story. I wonder if the authors could simplify the figure (by, perhaps, moving some of the panels to the supplement)?

#. It is interesting (Fig 4) that one of the CSD+SGA neonates has a high a high proportion of Gram neg organisms and a very low amount of TNF-alpha release in the MoDC assay. What do the authors make of this? Perhaps this was in the discussion and I missed it?

#### **Reviewer #3 (Remarks to the Author):**

After reviewing this manuscript again, I am quite impressed with the amount of attention and added work that the authors have given to the reviewers' comments and suggestions. While the previous manuscript was already strong, the authors acknowledged the rightful arguments made by all reviewers and submitted a revised paper that appropriately addressed all of the major points. The authors: added samples to the study (for microbiome analysis and immune assays), controlled for confounding variables known to influence microbiome structure, confirmed purity of LPS, performed the LPS assay under alternative conditions that normalized LPS concentrations across samples, provided added evidence that samples used for metagenomics were representative of all cohort samples, and limited the discussion to their findings, without associating to future health outcomes that were not assessed in their study. Truly, the authors should be commended for their effort. The result is an outstanding contribution to the field that in my view, confirms that mode of delivery impacts the infant microbiome, both taxonomically, functionally and in relation to the immune consequence to the infant host. I would seriously question who would continue to debate on this

issue after the findings presented by Wampach et al.

One comment I would like to leave with the authors, which does not impact this paper but may be helpful in future studies of a similar nature, is in reference to the answer in their rebuttal letter

(Lines 1126-1228):

**"We want to stress again that the main point of the manuscript is not statistics-driven, as the presence of strains, given their high degree of specificity, is valid only on an individual, sample-to-sample basis."**

**Their study argues that mode of delivery impacts infant microbiome structure and performed several analysis comparing two or more groups. All studies that compare variables of interest are subjected to statistics. Thus, all of these studies must be statistics-driven. I have learned this not as a biostatistician but after analyzing many human microbiome studies, where controlling for possibly confounding co-variates is the only valid method to link a microbiome feature with a variable of interest. There are enough studies available on the effect of antibiotics on infant microbiome, for example, to help direct future studies in terms of study design and number of samples necessary.**



**Manuscript reference number: NCOMMS-17-19613B**

**Responses to the reviewers' comments**

**N.B.: The original remarks by the reviewers are provided below in boxes whereas the authors' responses are listed in black type and cited passages from the manuscript are listed in blue.**

**Reviewer 1**

1.1. The authors performed a substantial amount of work and additional experiments for this revised manuscript. The new data is strong and all the crucial issues pointed out on the original submission seem to be fixed. One of the strongest points of the work is the increased vertical transmission of microbes in vaginally delivered infants compared to delivery via C-section.

We thank the reviewer for his/her positive evaluation of the efforts that were put into improving the manuscript.

1.2. The paper is convincing on the fact that vaginal deliver impacts the infant microbiome. The authors state that this was quite controversial, but I partially disagree with this. What was controversial is whether the effect on the microbiome of vaginal versus C-section delivery is long-lasting and whether it is stronger than other conditions including breast-feeding versus formula-feeding. Because in this study the infants are not followed for months and breast feeding is not discussed in depth, these questions cannot be answered. I think the authors should be a bit more careful when discussing the effect of delivery mode on the microbiome, because there are not really many controls for other conditions (again feeding regime).

We thank the reviewer for this comment. Indeed, we agree with the reviewer that the current discussions in the field of the neonatal microbiome do not only focus on the question of potentially long-lasting effects of delivery mode but also on the diverse set of factors which may affect the neonatal gut microbiome. In the introduction of the revised manuscript, we now more explicitly mention one specific publication (Chu et al. 2017), which claimed that delivery mode had no effect on the microbiome structure and which thereby sparked the

aforementioned controversy regarding the impact of delivery mode on the neonatal microbiome. Although our multivariate analysis showed that delivery mode was the strongest driver in our study, we do agree that our timeframe is limited. In this sense, our manuscript will most likely serve as a model for future metagenomic studies that will need to include more mother-neonate pairs. Additionally, these future studies will also be able to evaluate the specific effects of certain conditions such as feeding regime after the timeframe of the first 5 days after delivery. We have revised the manuscript to be more careful with our phrasing and have additionally adapted the title.

1.3. The introduction now is very comprehensive. However, it is also redundant and repeated in several passages. I feel the introduction should be shortened a bit and repeated concepts minimized. Also the discussion is very verbose.

We thank the reviewer for pointing this out. We have revised the introduction accordingly.

1.4. Is multiple hypothesis testing correction applied on the identification of 1,697 differential KEGG KOs at line 226?

We thank the reviewer for his/her comment. Yes, these tests were performed with multiple testing correction by controlling false discovery rate according to Benjamin and Hochberg (1995).

1.5. Figure 3A. It is difficult to see the vertical transmission events because of the use of a color gradient (shade of orange). More distinct colors should be adopted here, and in general the figure is not very intuitive. In the legend, it is not clear what "taxon without link" means

We thank the reviewer for pointing this out. We aimed to make the figures as clear and intuitive as possible to support our findings. Therefore, we tested many different options that allowed us to include all the current information into one graph. As several different methods for shared taxa between mother and neonate and strain identification were applied, the current version was the clearest in conferring all necessary information to the reader. We agree that gradient colours might be sometimes difficult to assess, however in this case it reflects best the fact that the darker the colour is, the more evidence was found to prove that strain transfer

between mother and neonate gut occurred. Additionally, as the taxa are already highlighted by distinct colours, we wanted to refrain from another panel of distinct colours and opted for an orange colour gradient instead.

A ‘taxon without link’ in this context described a taxon that was found in the maternal samples, but not found to be shared between mother and neonate based on all of the applied levels of analyses (e.g. neither the same taxon was identified, nor was the same strain detected in both mother and neonate gut microbiomes). We have revised the legend within Figure 3A to clarify this point.

Manuscript, figure legends, lines 1681 to 1684: The level of evidence of transmission is indicated by the shading colour, with darker shading for stronger evidence. A taxon without link describes a taxon that was found in the maternal samples, but not shared between mother and neonate.

1.6. line 212-220: microbiomes from different body sites of the mother and infants are here compared using correlation. Giving the large differences in the overall structure of the microbiome across body sites and hosts, I don't think correlation is the correct statistical tool to use.

We thank the reviewer for pointing this out. In the revised manuscript, we have additionally assessed the functional potentials of the distinct microbiome samples (vaginal swab and neonatal stool samples) using a principal coordinate analysis (PCoA) representing the ordination of their respective Jensen–Shannon distances. Based on these results, a large fraction of the vaginal swab microbiomes cluster together and represent a common microbial community structure. However, as both vaginal swab and early neonatal stool samples were marked by generally low numbers of identified KOs, some of the maternal vaginal microbiomes clustered together with neonatal microbiomes, making a clear distinction impossible. Therefore, we decided that a subsequent statistical analysis using correlation was valid in this specific case. We have included the PCoA plot and the matching plots representing the Jensen-Shannon distances comparing neonatal samples to maternal gut and vaginal swab samples as Supplementary Figure 4 and discuss the figure in the main manuscript.

Supplementary information, legend of figure 4: Assessment of functional potential across sample types and between maternal and neonatal samples. **a**, Principal coordinate analysis of Jensen-Shannon divergence was generated for the functional data of all different sample types. Lines connect samples which originated from the same neonate according to the order of sampling. **b**, Jensen-Shannon divergences of the functional profiles of the neonatal gut microbiomes to those of the respective maternal gut microbiomes. **c**, Jensen-Shannon divergences of the functional profiles of the neonatal gut microbiomes to those of the respective maternal vaginal microbiomes. Samples are coloured according to birth mode and small for gestational age (SGA) status. VD, delivery; CSD, caesarean-section delivery; M, maternal faeces; MV, maternal vaginal swab; N, neonatal faeces collected at day1 / day 3 / day 5. Boxplots: centre line – median, bounds – first and third quartile, whisker  $\leq 1.5 \times$  interquartile range.

Manuscript, results lines 271 to 277: To assess whether the apparent taxonomic differences between the gut microbiomes of VD and CSD neonates are reflected at the level of functional potential, we used the metagenomic sequencing data to calculate Jensen-Shannon divergences for all samples (Supplementary Fig. 4a). Overall, comparison of the functional profiles of all neonates to the gut microbial potential of their respective mothers highlighted that the neonatal gut microbiota were more divergent from the maternal vaginal microbiota than the corresponding gut microbiota (Supplementary Fig. 4a, b & c).

## Reviewer 2

2.1. In this manuscript, Wampach et al collected stool samples from mothers and matched neonates. They perform shotgun sequencing and analyze the gene-level differences between the stool microbiomes of vaginally born babies vs. C-section born babies. They find that genes encoding LPS synthesis are enriched in the vaginally born babies - and that the LPS extracted from these two stool types, when tested on primary human immune cells, elicits differences in cytokine release. The LPS extracted from the Vaginally born babies appears to be more immunostimulatory. Thus, the authors conclude that C-section disrupts transfer of specific microbial strains that are highly immunostimulatory, and that this may impact “neonatal immune system priming”.

Overall, the manuscript is much improved from its prior version. A notable strength of this manuscript is the collection and evaluation of very early post-natal samples (day 0-5) and the strong effort to characterize the functional impact of LPS on the immune system. The manuscript, as it stands, is a bit lengthy (especially in the discussion section), but is well carried out and interesting. I offer the following suggestions for improvement.

We thank the reviewer for re-evaluating the manuscript and for kindly acknowledging the efforts that were put into the revision.

### **Major suggestions**

2.2. The authors now allude to the existing controversy in evaluating the impact of birth-mode on microbial “transmission”. I propose that it might be better for the authors to steer clear of the transmission question and to simply report the results in the context of vaginally born and CS born babies having different microbiomes (which may be the consequence of confounding factors other than just birth mode - e.g. antibiotic exposure).

We thank the reviewer for his/her comment. Mention of the controversy regarding transmission according to delivery mode was in fact suggested by reviewer 1 in the previous revision phase. We agreed that this question should not go unmentioned, since our approach not only addresses differential analyses of gut microbiome structure and function according to delivery mode, but through integration of strain-level information points to differences in vertical strain transmission (see also doi: 10.1016/j.chom.2018.06.007 and doi: 10.1016/j.chom.2018.06.005). Furthermore, we want to highlight that an extensive multivariate analysis had identified the delivery mode as the main driver of the neonatal gut microbiome structure during the earliest days after birth.

2.3. The title suggests that birth mode is causal of strain-conferred gut microbiome functions and immunostimulatory potential - I think the title should be adjusted to reflect the fact that the authors identify an association, as opposed to a causal link between birth mode and these outcomes.

We thank the reviewer for the thoughtful suggestion and have changed the title in accordance with the editor's suggestion to 'Birth mode is associated with earliest strain-conferred gut microbiome functions and immunostimulatory potential'.

2.4. Are there any other notable differences between the VD and CSD babies? Or were these all elective CSD babies - which would be the best comparator.

We thank the reviewer for pointing this out. Indeed, the data is provided in the Supplementary Data 1: out of the CSD neonates for whom the high-resolution metagenomics approach was applied, only 1 was born by emergency C-section (C101), while all others were born by elective C-section.

2.5. I find the LPS aspect of the paper the most novel and exciting - but it is only briefly focused on in the manuscript. Also, is there a reason that only a subset of the total number of subjects was included in the LPS part of the study? Lastly, is there a reason the day 3 sample was selected (as opposed to the day 5 sample, which may have been higher biomass)?

We thank the reviewer for highlighting our work on the LPS extraction and stimulations assays. As highlighted in the manuscript (lines 1147 to 1150), only a subset of stool samples contained sufficient stool material (150 mg) for extracting measurable LPS concentrations. Additionally, some stool samples, although presenting the desired biomass (150 mg), did not yield any measurable LPS concentrations. The reason for this was either because the bacterial biomass in these samples was generally low or because some of these samples were just not rich enough in Gram-negative bacteria.

Furthermore, we chose to extract LPS from the neonatal stool samples of day 3 after delivery as both, the functional data (Figure 2a) and the cytokine data from plasma (Figure 4b), reflected the most significant differences according to delivery mode at this specific day of life. By selecting day 3, we were able integrate matching microbiome, LPS and plasma data. This rationale is now more clearly presented in the manuscript.

Manuscript, results, lines 502 to 517: Based on our data, the microbial composition differed most strongly in VD and CSD neonates on day 3 postpartum and, thereby, may critically

affect the developing immune system at this time<sup>12</sup>. We isolated LPS from faecal samples from day 3 with sufficient biomass from 16 neonates (7 VD, 7 CSD, 2 CSD+SGA; Supplementary Data 12; Methods).

### **Minor suggestions**

2.6. Would remove the phrase “After data curation” in the abstract - it is vague.

We thank the reviewer for his/her suggestion and have adapted the abstract accordingly.

2.7. line 76 - I am not exactly sure what the authors are referring to when they state “Although CSD is not associated with improved health outcomes...”.

We agree with this reviewer that this sentence was not clear and have removed the passage from the manuscript in line 139.

2.8. Line 86 - would call this 16S rRNA gene amplicon sequencing.

We agree with the reviewer and have changed this term accordingly.

2.9. Line 132 - for what proportion of samples could sufficient DNA be extracted for downstream metagenomic analysis?

While a total of 75 samples (including maternal vaginal swabs and stool and neonatal stool samples) were collected and extracted from the 16 mother-neonate pairs, a total of 65 samples yielded enough DNA to reliably proceed with metagenomic sequencing (87%). For only 2 out of these 65 samples a high proportion of the resulting data represented contaminant sequencing reads and were thus excluded from further analyses (samples MV\_C100 and V1\_C100). We have mentioned this in the revised manuscript, lines 973 to 975.

2.10. The majority of the analyses seem to focus on CSD +/- SGA compared to VD; I applaud the authors for including CSD -SGA controls - but am surprised that they chose not

to analyze the three groups (CSD -SGA, CSD + SGA and VD) separately, as this would be a much stronger analysis that lacked the likely confounding factors contributed by SGA.

We thank the reviewer for raising this comment. Indeed, the initial analyses were done by keeping the samples from CSD and CSD+SGA neonates as separate groups and comparing both independently to the microbiome characteristics of VD neonates. However, on each level of analysis, we observed that there were no pronounced differences between the CSD and CSD+SGA profiles, while both groups showed the same kind of differences compared to the VD microbiomes. Therefore, we report both groups together as CSD±SGA. We have clarified this aspect in the revised manuscript.

Manuscript, results lines 356 to 359: As comparisons between VD and CSD as well as VD and CSD+SGA were largely matching independent of SGA status, we combined both groups (CSD and CSD+SGA) to increase statistical power (CSD±SGA).

2.11. Line 422, 458 - calling the approach they employed “artefact-free” seems hyperbolic.

We agree with the reviewer and suggest to change ‘artefact-free’ to ‘artefact-curated’ throughout the entire manuscript.

2.12. line 490 - typo - “form” instead of “from”.

Thank you for this comment. We have corrected this typo.

2.13. Only 16 mother/neonate pairs were collected; yet, additional neonates were studied - the methods section could be more clear as to how those additional neonates were recruited to the study.

We agree with the reviewer that this aspect could be better explained in the manuscript. We have now added another sentence to the methods section.

Manuscript, methods lines 899 to 903: From the 33 neonates that were recruited into the study, the gut microbiome of 15 (Supplementary Data 1) had previously been characterised



using a combination of 16S rRNA gene amplicon sequencing and quantitative real-time PCR<sup>7</sup>. For a subset of neonates, the mother was sampled additionally.

2.14. I presume the authors used standard V4 primers for 16S sequencing. Please state this, if so.

We thank the reviewer for pointing this out and have specified this in the revised manuscript.

Manuscript, methods lines 960 to 963: All DNA samples (along with 8 controls) underwent standard amplicon sequencing of the V4 region of 16S rRNA genes using primers 515F-GTGCAGCMGCCGCGGTAA and 805R-GACTACHVGGGTATCTAATCC at the Center for Analytical Research and Technology–Groupe Interdisciplinaire de Génoprotéomique Appliquée (CART-GIGA; Liège, Belgium).

2.15. What is the “optimized low-quantity DNA library preparation kit” that was used?

We thank the reviewer for his/her comment. The library preparation was performed by the service provider GATC Biotech using validated standard procedures modified to optimize the method for automated library preparation. These protocols are proprietary to GATC Biotech and were not released to the authors. We referred to the fact that this sequencing was performed by GATC Biotech in the manuscript, lines 966 to 970.

2.16. Why were some of the metagenomic libraries (C105, 109, 110 and 119) prepared using another (presumably) kit?

During the revision of the manuscript, we additionally sequenced samples from 4 more mother-neonate pairs (C105, C109, C110, C119). At that time, our in-house sequencing platform was well established and experienced with low biomass samples so we chose to do the metagenomic sequencing in-house in order to have a shorter turn-around time. Although we could not use the exact same protocol or library preparation kit as the previous sequencing facility, the quality after in-house sequencing was at least as high as for the initial sequencing of the first samples of the 12 mother-neonate pairs.

2.17. The method for removing artifactual reads relies on contain assembly and alignment. What was the contig size cutoff used for this method? If the contig size cutoff is >read length, this might remove low abundance contaminants that are not present at a high enough abundance to assemble into contigs - thus compromising the effectiveness of this contamination removal effort.

We thank the reviewer for his/her comment. Indeed, we observed that the putative artefactual sequences were almost exclusively very small fragments that could not be assembled effectively or for which no genome reconstruction could be obtained. Therefore, as a defined contig size cutoff would have not taken into consideration the many low abundance contaminant reads, we opted to have no cut-off for any of the low biomass samples (neonatal samples and vaginal swab samples). More specifically, as the removal of putative artefactual sequences relies on the simultaneous binning of contigs from both study sample and contamination control samples, the cut-off for visualizing and considering contigs was set to >0 instead of the usual cut-off of >1000 nt (which was kept for the complex samples from maternal stool). Notably, the artefact removal was not only based on assembled contigs, but identified putative contaminant sequences were also removed from the original sample reads, which further highlights the need of properly identifying, assessing and removing putative artefactual contigs and reads from low biomass microbiome data.

Manuscript, methods lines 1002 to 1005: After removing the rRNA sequences from the contigs<sup>56</sup>, we performed joint binning of control cell-culture contigs with each of the samples' contigs individually using VizBin<sup>29</sup> without any length cut-off.

2.18. line 854 - Please provide some additional detail in text regarding the “further purification” that was used to obtain the LPS.

We now added more detail in the text, specifying the nature of the “further purification”.

Manuscript, methods lines 1150 to 1159: To maximise yields, LPS was purified from three aliquots of 50 mg of each neonatal faecal sample using the hot phenol–water method<sup>73</sup> and further purification was performed using a modified phenol re-extraction protocol<sup>74</sup>.

2.19. Line 856 - why was LPS from the three aliquots of stool pooled - presumably because each extraction resulted in a very small amount of LPS. I would have very much liked to see this assay done in replicate (starting with the stool), as I am not familiar with the variability of LPS extraction efficiency.

LPS extraction was much more efficient if it was done on small quantities of stool samples (e.g. 50 mg) compared to LPS extraction done on bigger quantities of stool samples (e.g. 150 mg). Therefore, three small aliquots were used and pooled afterwards to have enough LPS to work with. The variability of LPS extraction efficiency using the method described within the manuscript was quite low as we could observe that for the control samples, where we extracted LPS from pure *E. coli* cultures (each culture with an OD600 of 0.5), we could obtain similar amounts of LPS (please refer to the table below).

| <b>LPS in EU/ml<br/>(Replicate A)</b> | <b>LPS in EU/ml<br/>(Replicate B)</b> | <b>LPS in EU/ml<br/>(Replicate C)</b> | <b>LPS in EU/ml<br/>(Replicate D)</b> |
|---------------------------------------|---------------------------------------|---------------------------------------|---------------------------------------|
| 10,610.07                             | 8,018.01                              | 7,923.36                              | 9,363.41                              |

LPS was extracted from a pure *E.coli* overnight culture grown in LB medium. Based on OD600 reading, cultures were diluted to an OD600 of 0.5 and 1.5 ml of each culture was taken for LPS extraction. Bacterial suspensions were centrifuged at 10,600 g for 10 minutes, the supernatants were discarded and pellets were used for LPS extraction. LPS concentration was quantified using an ELISA-based endotoxin detection assay (Endolisa; # 609033, Hyglos GmbH, Germany).

2.20. What proportion of all metagenomic reads were assigned a potential function? I ask because it seems surprising that 2% of all metagenomic reads are classified as part of a 2-component system, for example. That seems rather high.

We thank the reviewer for pointing this out. 77 % of the curated metagenomic reads mapped to genes that were assigned a potential function (standard deviation 13 %) in the neonate stool samples displayed in the figure. This is now mentioned in the manuscript, lines 1019 to 1022.

2.21. Figure 3 is very complex and does not communicate a strong, focused story. I wonder if the authors could simplify the figure (by, perhaps, moving some of the panels to the supplement)?

We thank the reviewer for his/her suggestion. Although we agree that Figure 3 contains much information, removing some of the panels would not seem as intuitive to us, since the order of the panels follows the main results text, while giving concrete visual examples for both a CSD and VD case. We would therefore prefer not to move any of the information that supports the main message of the manuscript to the supplement.

2.22. It is interesting (Fig 4) that one of the CSD+SGA neonates has a high proportion of Gram neg organisms and a very low amount of TNF-alpha release in the MoDC assay. What do the authors make of this? Perhaps this was in the discussion and I missed it?

We thank the reviewer for this observation. Indeed, we were also intrigued by this case and had already previously addressed this in the supplementary information, note 6. We think that this specific case could point to the importance of the composition of the LPS rather than the overall abundance being crucial for immune system stimulation.

### **Reviewer 3**

3.1. After reviewing this manuscript again, I am quite impressed with the amount of attention and added work that the authors have given to the reviewers' comments and suggestions. While the previous manuscript was already strong, the authors acknowledged the rightful arguments made by all reviewers and submitted a revised paper that appropriately addressed all of the major points. The authors: added samples to the study (for microbiome analysis and immune assays), controlled for confounding variables known to influence microbiome structure, confirmed purity of LPS, performed the LPS assay under alternative conditions that normalized LPS concentrations across samples, provided added evidence that samples used for metagenomics were representative of all cohort samples, and limited the discussion to their findings, without associating to future health outcomes that were not assessed in their study. Truly, the authors should be commended for their effort. The result is an outstanding contribution to the field that in my view, confirms that mode of delivery impacts the infant

microbiome, both taxonomically, functionally and in relation to the immune consequence to the infant host. I would seriously question who would continue to debate on this issue after the findings presented by Wampach et al.

We are deeply thankful for the honest evaluation of our revised manuscript and for the overall positive feedback.

3.2. One comment I would like to leave with the authors, which does not impact this paper but may be helpful in future studies of a similar nature, is in reference to the answer in their rebuttal letter (Lines 1126-1228):

“We want to stress again that the main point of the manuscript is not statistics-driven, as the presence of strains, given their high degree of specificity, is valid only on an individual, sample-to-sample basis.”

Their study argues that mode of delivery impacts infant microbiome structure and performed several analysis comparing two or more groups. All studies that compare variables of interest are subjected to statistics. Thus, all of these studies must be statistics-driven. I have learned this not as a biostatistician but after analyzing many human microbiome studies, where controlling for possibly confounding co-variates is the only valid method to link a microbiome feature with a variable of interest. There are enough studies available on the effect of antibiotics on infant microbiome, for example, to help direct future studies in terms of study design and number of samples necessary.

We thank the reviewer for this very thoughtful comment. As the domain of microbiome research and especially the analysis of shotgun metagenomic sequencing is still maturing, we see this study as a methodological model for further studies. We hope to be able to perform additional studies with larger sample sizes to determine the effects of different factors on the neonatal gut microbiome in the future. In this context, the presented data will prove helpful to perform the corresponding power analyses.
